# Supplementary material for: Extensive evaluation of ATAC-seq protocols for native or formaldehyde-fixed nuclei
Source: BMC Genomics. 2022 Mar 17;23:214. doi: 10.1186/s12864-021-08266-x (PMC8928671; doi:10.1186/s12864-021-08266-x)
Supplement: Supplementary file 1 — Additional file 1: Supplementary Table S1. The QC metrics for both the GM12878 cell line and mouse lungs. Column 1 indicates the sample ID. Columns 2-4 show the ATAC components. Columns 5-8 specify the fixation state, nuclei input, replicate ID, and sample type. Columns 9-15 show the QC metrics. [file 12864_2021_8266_MOESM1_ESM.csv]

Sample_ID	Buffer	Temp	Tn5	Fixation_state	Input	Replicate	Sample_type	Total_reads	Deduplicated_reads	TSS_enrichment	FRiP	Est_complexity	Frac_mito	Sub_nuc
A1	Nextera_TD	37C	Nextera_Tn5	Native	20k	Rep1	GM12878	8994322	6801518	16.3627	0.4402	58407011	0.1006	1.6857
A2	Omni_TD	37C	Nextera_Tn5	Native	20k	Rep1	GM12878	8224562	5970728	18.3624	0.4626	50973259	0.1237	1.9977
A3	THS_TD	37C	Nextera_Tn5	Native	20k	Rep1	GM12878	7138182	4013128	20.7712	0.4667	35628065	0.2361	2.1069
A4	Nextera_TD	37C	Homemade_Tn5	Native	20k	Rep1	GM12878	7967642	6391270	14.3257	0.3669	59588938	0.0506	1.9319
A5	Omni_TD	37C	Homemade_Tn5	Native	20k	Rep1	GM12878	7038382	5446962	15.8702	0.4121	49482545	0.0638	1.9459
A6	THS_TD	37C	Homemade_Tn5	Native	20k	Rep1	GM12878	9366634	5867520	19.446	0.4159	49718478	0.175	1.9346
A7	Nextera_TD	55C	Nextera_Tn5	Native	20k	Rep1	GM12878	6532294	3361652	14.6232	0.3079	30918415	0.3546	1.3595
A8	Omni_TD	55C	Nextera_Tn5	Native	20k	Rep1	GM12878	4194364	2024784	14.0124	0.2781	19460696	0.376	1.508
A9	THS_TD	55C	Nextera_Tn5	Native	20k	Rep1	GM12878	5368024	2912066	5.5047	0.0737	29073355	0.3099	1.9094
A10	Nextera_TD	55C	Homemade_Tn5	Native	20k	Rep1	GM12878	5485876	2781496	13.2587	0.2806	26622415	0.3426	1.2678
A11	Omni_TD	55C	Homemade_Tn5	Native	20k	Rep1	GM12878	6228798	3149296	13.0443	0.2612	30070280	0.3298	1.3496
A12	THS_TD	55C	Homemade_Tn5	Native	20k	Rep1	GM12878	11495126	6307114	6.3069	0.0811	59593023	0.2893	1.9578
B1	Nextera_TD	37C	Nextera_Tn5	Native	20k	Rep2	GM12878	5688192	4290954	16.2668	0.4262	39456912	0.0909	1.8698
B2	Omni_TD	37C	Nextera_Tn5	Native	20k	Rep2	GM12878	6557576	4793294	17.3858	0.4444	43884704	0.0945	1.8691
B3	THS_TD	37C	Nextera_Tn5	Native	20k	Rep2	GM12878	4914018	2555846	20.9092	0.4614	23633207	0.2402	2.0675
B4	Nextera_TD	37C	Homemade_Tn5	Native	20k	Rep2	GM12878	7171896	5610576	14.0102	0.3989	52170492	0.0473	1.8682
B5	Omni_TD	37C	Homemade_Tn5	Native	20k	Rep2	GM12878	3872930	2898188	16.6576	0.4407	28880701	0.063	2.2922
B6	THS_TD	37C	Homemade_Tn5	Native	20k	Rep2	GM12878	7584094	4432088	18.4049	0.4324	39628769	0.1636	1.9635
B7	Nextera_TD	55C	Nextera_Tn5	Native	20k	Rep2	GM12878	5950012	2843330	13.6846	0.2724	26761460	0.3827	1.2001
B8	Omni_TD	55C	Nextera_Tn5	Native	20k	Rep2	GM12878	10316160	4980998	13.5582	0.273	43983771	0.3695	1.3046
B9	THS_TD	55C	Nextera_Tn5	Native	20k	Rep2	GM12878	8792848	4524928	5.7227	0.0843	42906808	0.3123	2.3498
B10	Nextera_TD	55C	Homemade_Tn5	Native	20k	Rep2	GM12878	7522050	4575968	10.6701	0.2468	44860554	0.2279	0.8723
B11	Omni_TD	55C	Homemade_Tn5	Native	20k	Rep2	GM12878	9221512	4945450	12.3566	0.2652	45304082	0.3027	1.1479
B12	THS_TD	55C	Homemade_Tn5	Native	20k	Rep2	GM12878	11046714	6867358	5.6532	0.0873	66989942	0.2126	1.7635
C1	Nextera_TD	37C	Nextera_Tn5	Native	20k	Rep3	GM12878	4445316	3462072	16.7871	0.4353	33775676	0.0823	1.8659
C2	Omni_TD	37C	Nextera_Tn5	Native	20k	Rep3	GM12878	5927504	4434780	18.4278	0.4546	39945426	0.1008	2.1864
C3	THS_TD	37C	Nextera_Tn5	Native	20k	Rep3	GM12878	2962774	1762638	21.3004	0.4505	17632433	0.2244	2.1544
C4	Nextera_TD	37C	Homemade_Tn5	Native	20k	Rep3	GM12878	7119856	5621286	14.8644	0.3977	51235442	0.0514	2.196
C5	Omni_TD	37C	Homemade_Tn5	Native	20k	Rep3	GM12878	4641106	3564564	15.9169	0.4047	35029425	0.0538	2.153
C6	THS_TD	37C	Homemade_Tn5	Native	20k	Rep3	GM12878	9423880	5957372	18.9561	0.4332	50955453	0.1541	1.9267
C7	Nextera_TD	55C	Nextera_Tn5	Native	20k	Rep3	GM12878	4829046	2439766	14.6542	0.298	22737140	0.3722	1.3879
C8	Omni_TD	55C	Nextera_Tn5	Native	20k	Rep3	GM12878	6728876	3285388	14.5231	0.2843	29977936	0.3756	1.3595
C9	THS_TD	55C	Nextera_Tn5	Native	20k	Rep3	GM12878	11317174	5894362	6.1668	0.0811	54116341	0.3357	1.3535
C10	Nextera_TD	55C	Homemade_Tn5	Native	20k	Rep3	GM12878	8993848	4951160	13.0152	0.2794	46215891	0.2898	0.9994
C11	Omni_TD	55C	Homemade_Tn5	Native	20k	Rep3	GM12878	9591124	4933428	12.9733	0.2754	44175202	0.3151	1.0858
C12	THS_TD	55C	Homemade_Tn5	Native	20k	Rep3	GM12878	11140090	5951446	6.5726	0.0872	53950210	0.30620000000000003	1.6872
D1	Nextera_TD	37C	Nextera_Tn5	Native	20k	Rep4	GM12878	5811994	4315744	16.8554	0.43	40852779	0.0979	2.1603
D2	Omni_TD	37C	Nextera_Tn5	Native	20k	Rep4	GM12878	7443290	5571722	17.6075	0.4411	50344576	0.0969	2.2823
D3	THS_TD	37C	Nextera_Tn5	Native	20k	Rep4	GM12878	4725952	2590076	21.6861	0.4646	24514705	0.2369	2.1448
D4	Nextera_TD	37C	Homemade_Tn5	Native	20k	Rep4	GM12878	3944622	2958318	17.0089	0.4323	29167694	0.0813	2.2491
D5	Omni_TD	37C	Homemade_Tn5	Native	20k	Rep4	GM12878	7218704	5134804	18.7022	0.4639	44321585	0.0958	2.7202
D6	THS_TD	37C	Homemade_Tn5	Native	20k	Rep4	GM12878	11202468	6444154	22.4383	0.4665	49296095	0.2059	2.3203
D7	Nextera_TD	55C	Nextera_Tn5	Native	20k	Rep4	GM12878	8254004	4094686	13.9739	0.2563	37139637	0.36870000000000003	1.5256
D8	Omni_TD	55C	Nextera_Tn5	Native	20k	Rep4	GM12878	10998418	5500928	13.5054	0.2611	49250239	0.3506	1.4204
D9	THS_TD	55C	Nextera_Tn5	Native	20k	Rep4	GM12878	10858602	5465952	5.0619	0.0645	50807193	0.3251	1.9478
D10	Nextera_TD	55C	Homemade_Tn5	Native	20k	Rep4	GM12878	11835422	6094312	13.3605	0.2706	54719325	0.3145	1.2205
D11	Omni_TD	55C	Homemade_Tn5	Native	20k	Rep4	GM12878	11248970	5815416	12.4773	0.2147	52948142	0.3155	1.6562
D12	THS_TD	55C	Homemade_Tn5	Native	20k	Rep4	GM12878	10190382	5227950	5.0366	0.0623	47134559	0.3156	2.3875
E1	Nextera_TD	37C	Nextera_Tn5	Fixed	20k	Rep1	GM12878	8403000	4541218	7.4785	0.269	29913323	0.2417	0.8149
E2	Omni_TD	37C	Nextera_Tn5	Fixed	20k	Rep1	GM12878	5651312	3119906	7.3606	0.2663	20206490	0.2412	0.7847
E3	THS_TD	37C	Nextera_Tn5	Fixed	20k	Rep1	GM12878	7092014	2308938	6.9191	0.2298	16357172	0.4661	0.7559
E4	Nextera_TD	37C	Homemade_Tn5	Fixed	20k	Rep1	GM12878	5617796	3358580	7.2053	0.259	26793344	0.1488	0.7756
E5	Omni_TD	37C	Homemade_Tn5	Fixed	20k	Rep1	GM12878	9091324	4856684	7.1383	0.2637	31562337	0.1489	0.7967
E6	THS_TD	37C	Homemade_Tn5	Fixed	20k	Rep1	GM12878	4827604	1858722	6.7517	0.2254	14903383	0.3583	0.6882
E7	Nextera_TD	55C	Nextera_Tn5	Fixed	20k	Rep1	GM12878	7279110	1649620	12.1518	0.2889	12099084	0.6361	0.7971
E8	Omni_TD	55C	Nextera_Tn5	Fixed	20k	Rep1	GM12878	4365160	1365398	11.2824	0.2728	11867439	0.5135	0.6723
E9	THS_TD	55C	Nextera_Tn5	Fixed	20k	Rep1	GM12878	7200832	2101532	11.2837	0.2622	17258042	0.5367	0.7056
E10	Nextera_TD	55C	Homemade_Tn5	Fixed	20k	Rep1	GM12878	7871552	2951612	11.0591	0.2776	24915627	0.4548	0.6707
E11	Omni_TD	55C	Homemade_Tn5	Fixed	20k	Rep1	GM12878	7463994	2231276	11.0845	0.2834	17799154	0.5343	0.7656
E12	THS_TD	55C	Homemade_Tn5	Fixed	20k	Rep1	GM12878	8660618	1589160	10.3093	0.2454	10820479	0.6535	0.6956
F1	Nextera_TD	37C	Nextera_Tn5	Fixed	20k	Rep2	GM12878	8846448	5054900	6.7282	0.2534	24038326	0.1751	0.7952
F2	Omni_TD	37C	Nextera_Tn5	Fixed	20k	Rep2	GM12878	8486500	4753406	6.7832	0.2534	21879294	0.1808	0.8067
F3	THS_TD	37C	Nextera_Tn5	Fixed	20k	Rep2	GM12878	14634412	5357976	6.4671	0.219	23023441	0.4187	0.6609
F4	Nextera_TD	37C	Homemade_Tn5	Fixed	20k	Rep2	GM12878	5362254	3162672	6.5765	0.2418	23761035	0.1222	0.7971
F5	Omni_TD	37C	Homemade_Tn5	Fixed	20k	Rep2	GM12878	5003290	2942494	6.6184	0.247	22773157	0.1257	0.7966
F6	THS_TD	37C	Homemade_Tn5	Fixed	20k	Rep2	GM12878	4287850	1878102	6.0298	0.2031	15486710	0.3101	0.6522
F7	Nextera_TD	55C	Nextera_Tn5	Fixed	20k	Rep2	GM12878	6719774	1623014	11.1719	0.2762	12335792	0.605	0.7855
F8	Omni_TD	55C	Nextera_Tn5	Fixed	20k	Rep2	GM12878	6228162	1741198	10.9458	0.2699	14077219	0.5412	0.6967
F9	THS_TD	55C	Nextera_Tn5	Fixed	20k	Rep2	GM12878	5619192	1092576	10.7031	0.2526	7819706	0.6427	0.6798
F10	Nextera_TD	55C	Homemade_Tn5	Fixed	20k	Rep2	GM12878	7131132	2059832	10.9915	0.2826	16572288	0.5568	0.6971
F11	Omni_TD	55C	Homemade_Tn5	Fixed	20k	Rep2	GM12878	9751198	2759442	10.7588	0.2779	20849192	0.5498	0.7264
F12	THS_TD	55C	Homemade_Tn5	Fixed	20k	Rep2	GM12878	11642920	2197404	9.9866	0.2467	14063413	0.6586	0.668
G1	Nextera_TD	37C	Nextera_Tn5	Fixed	20k	Rep3	GM12878	5821782	3288940	8.0086	0.2699	24599343	0.2114	0.8738
G2	Omni_TD	37C	Nextera_Tn5	Fixed	20k	Rep3	GM12878	6595080	3749072	7.8588	0.2629	29302604	0.197	0.8422
G3	THS_TD	37C	Nextera_Tn5	Fixed	20k	Rep3	GM12878	5677906	2195638	7.6712	0.2331	18374706	0.3998	0.7502
G4	Nextera_TD	37C	Homemade_Tn5	Fixed	20k	Rep3	GM12878	7002498	4186476	7.6186	0.261	31869161	0.1359	0.8105
G5	Omni_TD	37C	Homemade_Tn5	Fixed	20k	Rep3	GM12878	6586810	3963066	7.3896	0.2576	29581557	0.1332	0.7981
G6	THS_TD	37C	Homemade_Tn5	Fixed	20k	Rep3	GM12878	6325230	2632420	7.2044	0.2287	20813332	0.3251	0.7013
G7	Nextera_TD	55C	Nextera_Tn5	Fixed	20k	Rep3	GM12878	5318618	1367284	12.0938	0.2913	11078700	0.5967	0.7432
G8	Omni_TD	55C	Nextera_Tn5	Fixed	20k	Rep3	GM12878	6510124	1764468	12.1361	0.2862	14635540	0.5629	0.7436
G9	THS_TD	55C	Nextera_Tn5	Fixed	20k	Rep3	GM12878	6964226	1514156	12.0292	0.2814	11270542	0.621	0.7357
G10	Nextera_TD	55C	Homemade_Tn5	Fixed	20k	Rep3	GM12878	7113804	2478428	11.4627	0.2827	20513231	0.4906	0.6969
G11	Omni_TD	55C	Homemade_Tn5	Fixed	20k	Rep3	GM12878	9462440	2758198	11.5691	0.2901	21643826	0.5329	0.7153
G12	THS_TD	55C	Homemade_Tn5	Fixed	20k	Rep3	GM12878	11001492	1722048	10.9685	0.2582	10697646	0.7047	0.7475
H1	Nextera_TD	37C	Nextera_Tn5	Fixed	20k	Rep4	GM12878	7490914	4144440	7.7341	0.2655	32770346	0.1994	0.8541
H2	Omni_TD	37C	Nextera_Tn5	Fixed	20k	Rep4	GM12878	9399346	4880306	7.7958	0.2608	38668366	0.2379	0.8622
H3	THS_TD	37C	Nextera_Tn5	Fixed	20k	Rep4	GM12878	5539032	2020646	7.2135	0.2237	18079731	0.3749	0.6948
H4	Nextera_TD	37C	Homemade_Tn5	Fixed	20k	Rep4	GM12878	6718524	4022542	7.3921	0.2621	31720370	0.1515	0.8431
H5	Omni_TD	37C	Homemade_Tn5	Fixed	20k	Rep4	GM12878	6846470	3900480	7.3263	0.2611	29992720	0.1491	0.8389
H6	THS_TD	37C	Homemade_Tn5	Fixed	20k	Rep4	GM12878	9470336	3513698	6.9759	0.227	23335283	0.3724	0.7196
H7	Nextera_TD	55C	Nextera_Tn5	Fixed	20k	Rep4	GM12878	8071770	2461920	11.5844	0.2803	20879099	0.5036	0.7
H8	Omni_TD	55C	Nextera_Tn5	Fixed	20k	Rep4	GM12878	6964698	2127578	11.3164	0.274	17739832	0.507	0.732
H9	THS_TD	55C	Nextera_Tn5	Fixed	20k	Rep4	GM12878	6343530	1337868	11.1953	0.2618	10156744	0.6056	0.7259
H10	Nextera_TD	55C	Homemade_Tn5	Fixed	20k	Rep4	GM12878	7420240	1786662	11.4524	0.2869	13687117	0.591	0.777
H11	Omni_TD	55C	Homemade_Tn5	Fixed	20k	Rep4	GM12878	7273410	1643312	10.95	0.2802	12176510	0.614	0.7259
H12	THS_TD	55C	Homemade_Tn5	Fixed	20k	Rep4	GM12878	11185320	2156572	10.252	0.2527	14823228	0.6567	0.6925
A1_B1	Nextera_TD	37C	Nextera_Tn5	Native	20k	Rep1	Mouse_lung	8730360	7460312	10.2161	0.3312	74851149	0.0257	3.2075
A2_B1	Omni_TD	37C	Nextera_Tn5	Native	20k	Rep1	Mouse_lung	12727406	10823334	10.6481	0.3323	101460644	0.026	3.3053
A3_B1	THS_TD	37C	Nextera_Tn5	Native	20k	Rep1	Mouse_lung	7439780	6279266	11.6601	0.325	63520411	0.0272	2.5929
A4_B1	Nextera_TD	37C	Homemade_Tn5	Native	20k	Rep1	Mouse_lung	15036410	12611076	10.1008	0.3234	114576737	0.0159	4.0812
A5_B1	Omni_TD	37C	Homemade_Tn5	Native	20k	Rep1	Mouse_lung	12385486	10370262	10.6581	0.3346	93296064	0.017	4.4904
A6_B1	THS_TD	37C	Homemade_Tn5	Native	20k	Rep1	Mouse_lung	8818820	7403498	10.8516	0.3238	77231619	0.0181	2.7468
C1_B1	Nextera_TD	55C	Nextera_Tn5	Native	20k	Rep1	Mouse_lung	12566126	10590648	8.8715	0.2533	105164860	0.0184	2.5175
C2_B1	Omni_TD	55C	Nextera_Tn5	Native	20k	Rep1	Mouse_lung	11198388	9468538	8.9948	0.2569	95048525	0.0179	2.2969
C3_B1	THS_TD	55C	Nextera_Tn5	Native	20k	Rep1	Mouse_lung	13714830	10953870	5.3434	0.115	105014376	0.0172	2.086
C4_B1	Nextera_TD	55C	Homemade_Tn5	Native	20k	Rep1	Mouse_lung	18357016	15508764	7.3179	0.2433	152834751	0.011	2.2793
C5_B1	Omni_TD	55C	Homemade_Tn5	Native	20k	Rep1	Mouse_lung	19294056	16164844	7.1167	0.2263	159988028	0.0101	2.6772
C6_B1	THS_TD	55C	Homemade_Tn5	Native	20k	Rep1	Mouse_lung	16470400	13122174	4.0762	0.0892	143595581	0.0085	3.276
E1_B1	Nextera_TD	37C	Nextera_Tn5	Native	1k	Rep1	Mouse_lung	9378798	7439828	10.3975	0.3305	22030269	0.0235	3.6746
E2_B1	Omni_TD	37C	Nextera_Tn5	Native	1k	Rep1	Mouse_lung	10754112	8546006	10.5082	0.3231	25060874	0.0249	3.8084
E3_B1	THS_TD	37C	Nextera_Tn5	Native	1k	Rep1	Mouse_lung	8510676	6355364	11.3063	0.3086	13093339	0.031	2.546
E4_B1	Nextera_TD	37C	Homemade_Tn5	Native	1k	Rep1	Mouse_lung	15046082	9244454	9.8445	0.3174	28405109	0.0121	4.0633
E5_B1	Omni_TD	37C	Homemade_Tn5	Native	1k	Rep1	Mouse_lung	13429036	7794458	10.1837	0.3398	24441002	0.0131	4.0446
E6_B1	THS_TD	37C	Homemade_Tn5	Native	1k	Rep1	Mouse_lung	17913986	9366594	10.0053	0.3076	27799416	0.0112	2.6251
G1_B1	Nextera_TD	55C	Nextera_Tn5	Native	1k	Rep1	Mouse_lung	11181040	8936588	8.7316	0.258	29167974	0.0187	2.0054
G2_B1	Omni_TD	55C	Nextera_Tn5	Native	1k	Rep1	Mouse_lung	14727650	11655792	8.601	0.2316	36147066	0.0155	2.8363
G3_B1	THS_TD	55C	Nextera_Tn5	Native	1k	Rep1	Mouse_lung	8352210	6262948	4.0654	0.0809	22503849	0.0142	2.4775
G4_B1	Nextera_TD	55C	Homemade_Tn5	Native	1k	Rep1	Mouse_lung	15647840	9667656	7.3303	0.2414	40719971	0.009	2.6025
G5_B1	Omni_TD	55C	Homemade_Tn5	Native	1k	Rep1	Mouse_lung	12081644	8091470	7.0491	0.2256	42441466	0.0085	2.7077
G6_B1	THS_TD	55C	Homemade_Tn5	Native	1k	Rep1	Mouse_lung	12971372	8854850	3.1099	0.0742	58129269	0.0043	4.0858
A1_B2	Nextera_TD	37C	Nextera_Tn5	Native	20k	Rep2	Mouse_lung	9763612	8137972	8.9345	0.292	84279681	0.0341	3.0997
A2_B2	Omni_TD	37C	Nextera_Tn5	Native	20k	Rep2	Mouse_lung	8525436	7090304	10.0527	0.299	73531377	0.0349	3.1754
A3_B2	THS_TD	37C	Nextera_Tn5	Native	20k	Rep2	Mouse_lung	8871566	7322534	10.1692	0.2616	77396072	0.0259	2.8
A4_B2	Nextera_TD	37C	Homemade_Tn5	Native	20k	Rep2	Mouse_lung	11911496	9821772	8.6837	0.2733	96880923	0.015	5.0294
A5_B2	Omni_TD	37C	Homemade_Tn5	Native	20k	Rep2	Mouse_lung	10507454	8733756	9.5695	0.3126	85702202	0.0194	4.8805
A6_B2	THS_TD	37C	Homemade_Tn5	Native	20k	Rep2	Mouse_lung	8686778	7203950	9.1831	0.2813	80273924	0.0193	3.5618
C1_B2	Nextera_TD	55C	Nextera_Tn5	Native	20k	Rep2	Mouse_lung	12724682	10513130	8.5486	0.2368	106006088	0.025	2.577
C2_B2	Omni_TD	55C	Nextera_Tn5	Native	20k	Rep2	Mouse_lung	11299174	9243166	8.4835	0.2187	95153086	0.0249	2.3873
C3_B2	THS_TD	55C	Nextera_Tn5	Native	20k	Rep2	Mouse_lung	5744694	4500900	4.9616	0.0972	50474579	0.0219	2.6125
C4_B2	Nextera_TD	55C	Homemade_Tn5	Native	20k	Rep2	Mouse_lung	11459894	9575040	7.1275	0.2282	106013479	0.0133	2.6642
C5_B2	Omni_TD	55C	Homemade_Tn5	Native	20k	Rep2	Mouse_lung	10942948	9143592	6.8653	0.22	102019417	0.0134	2.4439
C6_B2	THS_TD	55C	Homemade_Tn5	Native	20k	Rep2	Mouse_lung	9083860	7215348	4.5112	0.094	81838780	0.0104	3.3279
E1_B2	Nextera_TD	37C	Nextera_Tn5	Native	1k	Rep2	Mouse_lung	7725310	6297274	9.2634	0.3079	29627511	0.0285	3.9648
E2_B2	Omni_TD	37C	Nextera_Tn5	Native	1k	Rep2	Mouse_lung	12506416	9770914	10.2422	0.3189	29236588	0.0356	3.8897
E3_B2	THS_TD	37C	Nextera_Tn5	Native	1k	Rep2	Mouse_lung	6864912	5374718	10.2206	0.2736	19419793	0.0312	2.7364
E4_B2	Nextera_TD	37C	Homemade_Tn5	Native	1k	Rep2	Mouse_lung	11229608	7410528	8.8219	0.3078	36474590	0.0149	4.1149
E5_B2	Omni_TD	37C	Homemade_Tn5	Native	1k	Rep2	Mouse_lung	11234006	7551580	8.5243	0.2564	39046586	0.0127	5.3957
E6_B2	THS_TD	37C	Homemade_Tn5	Native	1k	Rep2	Mouse_lung	7356974	4640690	9.0283	0.2921	27026088	0.016	2.7472
G1_B2	Nextera_TD	55C	Nextera_Tn5	Native	1k	Rep2	Mouse_lung	13787712	10969000	7.5729	0.2119	42543007	0.0175	2.9136
G2_B2	Omni_TD	55C	Nextera_Tn5	Native	1k	Rep2	Mouse_lung	9920220	7850594	8.1702	0.2158	28883294	0.0197	2.2358
G3_B2	THS_TD	55C	Nextera_Tn5	Native	1k	Rep2	Mouse_lung	11914628	9013530	3.2285	0.0673	40748066	0.0109	2.8791
G4_B2	Nextera_TD	55C	Homemade_Tn5	Native	1k	Rep2	Mouse_lung	14920754	10235330	6.0114	0.1884	59960207	0.009	3.211
G5_B2	Omni_TD	55C	Homemade_Tn5	Native	1k	Rep2	Mouse_lung	12672284	8461036	5.9475	0.171	50044362	0.0079	3.5534
G6_B2	THS_TD	55C	Homemade_Tn5	Native	1k	Rep2	Mouse_lung	12070596	8231286	2.738	0.0634	55178741	0.005	4.5021
A1_B3	Nextera_TD	37C	Nextera_Tn5	Native	20k	Rep3	Mouse_lung	9737296	8242518	10.7259	0.3117	82514216	0.0229	3.6086
A2_B3	Omni_TD	37C	Nextera_Tn5	Native	20k	Rep3	Mouse_lung	10445756	8821356	11.1772	0.3144	88962148	0.0234	3.5687
A3_B3	THS_TD	37C	Nextera_Tn5	Native	20k	Rep3	Mouse_lung	9705496	8153538	11.8787	0.3028	81454202	0.0224	2.7582
A4_B3	Nextera_TD	37C	Homemade_Tn5	Native	20k	Rep3	Mouse_lung	15575568	12990108	9.7966	0.3051	118989814	0.0134	4.4999
A5_B3	Omni_TD	37C	Homemade_Tn5	Native	20k	Rep3	Mouse_lung	10123890	8421796	10.4524	0.3126	81794112	0.0144	5.1392
A6_B3	THS_TD	37C	Homemade_Tn5	Native	20k	Rep3	Mouse_lung	8208010	6863610	9.6067	0.2789	75254580	0.0146	3.2182
C1_B3	Nextera_TD	55C	Nextera_Tn5	Native	20k	Rep3	Mouse_lung	11140510	9308716	9.2067	0.2382	96386404	0.019	2.438
C2_B3	Omni_TD	55C	Nextera_Tn5	Native	20k	Rep3	Mouse_lung	14502326	12117060	9.1993	0.2355	124335658	0.0193	2.335
C3_B3	THS_TD	55C	Nextera_Tn5	Native	20k	Rep3	Mouse_lung	11667754	9344870	5.8406	0.1135	97166471	0.0165	2.2347
C4_B3	Nextera_TD	55C	Homemade_Tn5	Native	20k	Rep3	Mouse_lung	13811998	11518496	7.3328	0.2096	126389215	0.0106	2.6284
C5_B3	Omni_TD	55C	Homemade_Tn5	Native	20k	Rep3	Mouse_lung	18606476	15449624	7.485	0.2117	159506261	0.0109	2.6715
C6_B3	THS_TD	55C	Homemade_Tn5	Native	20k	Rep3	Mouse_lung	16856060	13414684	4.6916	0.0958	148393797	0.008	3.454
E1_B3	Nextera_TD	37C	Nextera_Tn5	Native	1k	Rep3	Mouse_lung	9535088	7583898	10.4727	0.2917	25962295	0.0242	3.7151
E2_B3	Omni_TD	37C	Nextera_Tn5	Native	1k	Rep3	Mouse_lung	12691678	9875000	11.042	0.3009	27083235	0.026	4.0973
E3_B3	THS_TD	37C	Nextera_Tn5	Native	1k	Rep3	Mouse_lung	10474672	8044202	10.9512	0.2438	24494751	0.0228	2.4454
E4_B3	Nextera_TD	37C	Homemade_Tn5	Native	1k	Rep3	Mouse_lung	17264644	11312116	9.0886	0.2755	41942420	0.0102	4.4406
E5_B3	Omni_TD	37C	Homemade_Tn5	Native	1k	Rep3	Mouse_lung	11778790	7772818	9.5258	0.2984	33132452	0.0117	3.9195
E6_B3	THS_TD	37C	Homemade_Tn5	Native	1k	Rep3	Mouse_lung	16016270	10199944	8.6484	0.2018	38447197	0.0092	3.3519
G1_B3	Nextera_TD	55C	Nextera_Tn5	Native	1k	Rep3	Mouse_lung	15548610	11986876	7.4767	0.1596	51359250	0.0121	4.0539
G2_B3	Omni_TD	55C	Nextera_Tn5	Native	1k	Rep3	Mouse_lung	13801652	11005340	8.4624	0.2128	42317304	0.0164	2.3009
G3_B3	THS_TD	55C	Nextera_Tn5	Native	1k	Rep3	Mouse_lung	12593902	9728450	3.2668	0.0714	44884200	0.0084	3.0019
G4_B3	Nextera_TD	55C	Homemade_Tn5	Native	1k	Rep3	Mouse_lung	16641494	11194086	6.2281	0.1827	58027115	0.006	3.1257
G5_B3	Omni_TD	55C	Homemade_Tn5	Native	1k	Rep3	Mouse_lung	13712336	9348528	6.3302	0.1799	47766154	0.0066	3.0009
G6_B3	THS_TD	55C	Homemade_Tn5	Native	1k	Rep3	Mouse_lung	12999184	9162542	2.8862	0.068	63958877	0.004	3.9254
