# Supplementary material for: Extensive evaluation of ATAC-seq protocols for native or formaldehyde-fixed nuclei
Source: BMC Genomics. 2022 Mar 17;23:214. doi: 10.1186/s12864-021-08266-x (PMC8928671; doi:10.1186/s12864-021-08266-x)
Supplement: Supplementary file 8 — Additional file 8: Supplementary Table S8. Differential motif deviation analysis results generated using chromVAR in fixed samples. Files contain results for differential deviation score tests between clusters for all motifs. Column 1 is the human motif ID from JASPAR CORE database; Columns 2 and 3 indicate the p value and adjusted p value calculated by the differentialDeviations function in chromVAR; Column 4 shows the difference between the mean of bias corrected deviations in 37°C samples and the mean of bias corrected deviations in 55°C samples. [file 12864_2021_8266_MOESM8_ESM.csv]

Motif_id	p_value	p_value_adjusted	Difference_dev
MA0003.3_TFAP2A	0.514960388	0.552151972	-8.43E-04
MA0009.2_T	2.67E-05	6.51E-05	0.015767526
MA0014.2_PAX5	8.17E-11	5.34E-10	0.022823859
MA0017.2_NR2F1	3.88E-15	6.80E-14	0.022821435
MA0018.2_CREB1	2.08E-14	3.22E-13	-0.040806441
MA0024.3_E2F1	2.16E-19	7.57E-18	-0.057132921
MA0025.1_NFIL3	0.004727896	0.007604033	-0.00577998
MA0027.2_EN1	1.53E-06	4.60E-06	-0.019394364
MA0028.2_ELK1	1.74E-08	7.70E-08	-0.015166746
MA0030.1_FOXF2	0.026491497	0.038155663	-0.004298482
MA0031.1_FOXD1	0.037450323	0.052951739	-0.005059725
MA0032.2_FOXC1	0.050179145	0.068201233	-0.002597592
MA0033.2_FOXL1	1.18E-04	2.49E-04	-0.007006664
MA0036.2_GATA2	0.336689122	0.382241179	0.001722872
MA0037.2_GATA3	0.001216544	0.002134481	-0.006731845
MA0042.2_FOXI1	1.18E-04	2.49E-04	-0.007006664
MA0043.2_HLF	0.048713389	0.066678611	-0.005338415
MA0046.2_HNF1A	1.28E-09	6.69E-09	-0.012115396
MA0048.2_NHLH1	0.006794447	0.01070472	0.004396583
MA0050.2_IRF1	0.001173341	0.002068081	0.005522006
MA0051.1_IRF2	0.138748152	0.172763828	0.002886865
MA0052.3_MEF2A	8.03E-04	0.001469037	0.008118677
MA0056.1_MZF1	0.439988046	0.479760977	0.001013653
MA0057.1_MZF1(var.2)	2.01E-04	4.05E-04	-0.007027143
MA0058.3_MAX	0.00292747	0.004913058	-0.00862184
MA0059.1_MAX::MYC	0.271646653	0.316784315	-0.002716959
MA0060.2_NFYA	0.00189203	0.003260373	-0.008086368
MA0066.1_PPARG	3.79E-13	4.06E-12	0.018726808
MA0068.2_PAX4	1.09E-10	7.02E-10	-0.028164583
MA0069.1_Pax6	3.82E-04	7.34E-04	0.011038115
MA0070.1_PBX1	0.727712961	0.761239032	9.03E-04
MA0071.1_RORA	0.250682321	0.294113604	0.002707625
MA0072.1_RORA(var.2)	0.86399014	0.877446407	3.56E-04
MA0073.1_RREB1	3.60E-08	1.49E-07	0.009367034
MA0074.1_RXRA::VDR	5.63E-07	1.77E-06	0.012851431
MA0076.2_ELK4	3.78E-07	1.23E-06	-0.010301065
MA0077.1_SOX9	0.866080521	0.877446407	4.07E-04
MA0079.3_SP1	4.50E-06	1.30E-05	-0.005348818
MA0080.4_SPI1	7.46E-06	2.04E-05	0.012514823
MA0081.1_SPIB	0.040144423	0.056144012	0.002876161
MA0083.3_SRF	0.248429126	0.292785833	-0.003799724
MA0084.1_SRY	0.97459022	0.97459022	6.92E-05
MA0088.2_ZNF143	0.123172027	0.155883287	-0.002725733
MA0090.2_TEAD1	0.513582728	0.552151972	0.00119068
MA0091.1_TAL1::TCF3	7.67E-08	2.77E-07	0.011440867
MA0093.2_USF1	0.413831988	0.455097286	0.002335726
MA0095.2_YY1	8.17E-14	1.09E-12	-0.016286982
MA0098.3_ETS1	0.11190127	0.143979634	-0.003739909
MA0099.2_FOS::JUN	1.55E-05	4.10E-05	0.017965571
MA0101.1_REL	0.277323141	0.322429917	-0.007896773
MA0102.3_CEBPA	2.81E-09	1.35E-08	0.013122528
MA0103.2_ZEB1	5.02E-19	1.62E-17	0.019476112
MA0105.4_NFKB1	0.004483097	0.007301585	0.013529753
MA0106.3_TP53	0.02260493	0.032802642	0.006680238
MA0107.1_RELA	0.395728884	0.438940659	-0.006084072
MA0112.3_ESR1	1.40E-10	8.45E-10	0.022251705
MA0113.3_NR3C1	0.820859875	0.839096565	-5.54E-04
MA0115.1_NR1H2::RXRA	8.68E-04	0.001573604	0.006368681
MA0119.1_NFIC::TLX1	9.46E-08	3.29E-07	0.012594581
MA0122.2_NKX3-2	7.88E-04	0.001449297	-0.007652178
MA0130.1_ZNF354C	0.041392847	0.057681007	0.002216052
MA0131.2_HINFP	7.38E-17	1.58E-15	-0.031292922
MA0132.2_PDX1	2.03E-06	6.07E-06	-0.017690975
MA0136.2_ELF5	0.238964714	0.285226995	-0.002252102
MA0137.3_STAT1	2.57E-13	3.01E-12	-0.01348076
MA0138.2_REST	9.97E-07	3.10E-06	0.007617241
MA0139.1_CTCF	0.004076726	0.006724855	0.012014254
MA0140.2_GATA1::TAL1	0.33969596	0.384523873	0.00232795
MA0141.3_ESRRB	4.76E-11	3.34E-10	0.015096016
MA0144.2_STAT3	2.24E-05	5.65E-05	-0.006535878
MA0145.3_TFCP2	0.884752913	0.893465571	4.72E-04
MA0148.3_FOXA1	0.922928616	0.927735536	1.46E-04
MA0149.1_EWSR1-FLI1	5.63E-11	3.81E-10	-0.009409837
MA0152.1_NFATC2	1.93E-18	5.33E-17	-0.018966371
MA0153.2_HNF1B	1.42E-05	3.77E-05	-0.009608525
MA0154.3_EBF1	0.012416108	0.018648318	0.006834621
MA0155.1_INSM1	7.52E-04	0.00139557	0.005874363
MA0156.2_FEV	0.303602475	0.349827633	-0.002616592
MA0157.2_FOXO3	0.037450323	0.052951739	-0.005059725
MA0158.1_HOXA5	1.97E-05	5.01E-05	-0.0092189
MA0159.1_RARA::RXRA	1.63E-05	4.24E-05	0.011235383
MA0160.1_NR4A2	5.63E-09	2.59E-08	0.012408014
MA0161.1_NFIC	0.419062261	0.459539866	-7.78E-04
MA0162.2_EGR1	0.127887368	0.160694295	-0.001469208
MA0163.1_PLAG1	1.05E-04	2.28E-04	0.005518844
MA0258.2_ESR2	4.33E-13	4.51E-12	0.016372635
MA0259.1_ARNT::HIF1A	0.128222391	0.160694295	-0.005709001
MA0442.1_SOX10	0.007072518	0.01105423	-0.00190211
MA0462.1_BATF::JUN	1.37E-04	2.82E-04	0.015859944
MA0464.2_BHLHE40	0.292918677	0.339539367	-0.004257226
MA0465.1_CDX2	3.90E-07	1.25E-06	-0.007493398
MA0466.2_CEBPB	0.015702124	0.023222299	0.007123651
MA0468.1_DUX4	0.036138703	0.051664961	-0.004452478
MA0469.2_E2F3	4.38E-11	3.13E-10	-0.043778832
MA0470.1_E2F4	6.99E-20	3.00E-18	-0.026099063
MA0471.1_E2F6	2.60E-15	5.01E-14	-0.014467377
MA0472.2_EGR2	0.394110748	0.438405616	-0.001652353
MA0473.2_ELF1	4.58E-06	1.31E-05	-0.010427463
MA0474.2_ERG	0.862867212	0.877446407	3.87E-04
MA0475.2_FLI1	0.777487244	0.800293537	-6.55E-04
MA0476.1_FOS	1.39E-04	2.84E-04	0.016741414
MA0477.1_FOSL1	2.31E-05	5.77E-05	0.018648908
MA0478.1_FOSL2	7.22E-05	1.59E-04	0.017843168
MA0479.1_FOXH1	0.010419714	0.015834684	0.00501601
MA0481.1_FOXP1	0.007298885	0.011360361	-0.005536807
MA0484.1_HNF4G	0.241358492	0.286659625	-0.002051562
MA0486.2_HSF1	0.335009529	0.381456278	-0.001673143
MA0488.1_JUN	0.044909252	0.062132513	-0.004520087
MA0489.1_JUN(var.2)	6.26E-04	0.001179078	0.015106846
MA0490.1_JUNB	3.82E-05	9.04E-05	0.018833266
MA0491.1_JUND	1.99E-04	4.02E-04	0.016367342
MA0492.1_JUND(var.2)	0.017745057	0.026044076	-0.00559439
MA0495.1_MAFF	0.185590494	0.225987163	0.002050708
MA0496.1_MAFK	0.1171806	0.149279576	0.002289805
MA0497.1_MEF2C	0.175979578	0.214962396	0.003009437
MA0498.2_MEIS1	3.57E-06	1.04E-05	0.008581653
MA0501.1_MAF::NFE2	0.129974809	0.162363354	0.004017355
MA0502.1_NFYB	6.00E-05	1.36E-04	-0.011054037
MA0504.1_NR2C2	0.057843966	0.077442871	-0.002700125
MA0506.1_NRF1	5.09E-31	1.97E-28	-0.061313565
MA0507.1_POU2F2	4.95E-11	3.41E-10	0.012816368
MA0508.1_PRDM1	0.305591464	0.351066384	0.001384531
MA0510.2_RFX5	0.35064863	0.393460382	0.002893944
MA0511.2_RUNX2	1.34E-05	3.59E-05	0.008250949
MA0513.1_SMAD2::SMAD3::SMAD4	1.08E-13	1.39E-12	0.018669293
MA0516.1_SP2	2.13E-11	1.58E-10	-0.007470568
MA0517.1_STAT1::STAT2	4.42E-06	1.28E-05	0.009154046
MA0522.2_TCF3	1.81E-21	1.16E-19	0.028762169
MA0523.1_TCF7L2	0.001309642	0.002287429	0.006537619
MA0524.2_TFAP2C	0.239413333	0.285226995	0.001862095
MA0525.2_TP63	1.40E-04	2.86E-04	0.011423536
MA0526.1_USF2	0.001100078	0.00196588	0.008108877
MA0527.1_ZBTB33	2.93E-13	3.33E-12	-0.031891737
MA0528.1_ZNF263	5.09E-04	9.63E-04	-0.003435056
MA0593.1_FOXP2	0.01629505	0.024007212	-0.003537335
MA0595.1_SREBF1	1.59E-14	2.56E-13	0.019133751
MA0596.1_SREBF2	4.24E-12	3.41E-11	0.017040226
MA0597.1_THAP1	0.348016057	0.392790053	0.001603644
MA0598.2_EHF	0.001449879	0.00252096	-0.00709853
MA0599.1_KLF5	2.06E-11	1.56E-10	-0.007327259
MA0600.2_RFX2	0.152248466	0.188964334	0.004718625
MA0610.1_DMRT3	6.23E-06	1.73E-05	0.014051242
MA0612.1_EMX1	1.32E-05	3.57E-05	-0.013737217
MA0613.1_FOXG1	0.037450323	0.052951739	-0.005059725
MA0618.1_LBX1	3.34E-04	6.48E-04	-0.011305275
MA0625.1_NFATC3	7.47E-14	1.03E-12	-0.015090356
MA0628.1_POU6F1	7.62E-08	2.77E-07	-0.020927649
MA0630.1_SHOX	6.29E-08	2.36E-07	-0.018398187
MA0634.1_ALX3	3.27E-12	2.85E-11	-0.022652272
MA0635.1_BARHL2	5.99E-05	1.36E-04	-0.013621311
MA0636.1_BHLHE41	0.248792107	0.292785833	-0.005136099
MA0637.1_CENPB	1.19E-07	4.07E-07	-0.027208052
MA0638.1_CREB3	1.47E-09	7.47E-09	-0.022673541
MA0639.1_DBP	0.661868189	0.698035849	-0.001374008
MA0640.1_ELF3	0.027761941	0.039836837	-0.004947439
MA0641.1_ELF4	3.95E-05	9.31E-05	-0.009031794
MA0642.1_EN2	9.42E-08	3.29E-07	-0.017498823
MA0644.1_ESX1	1.32E-10	8.22E-10	-0.017715931
MA0645.1_ETV6	0.40858327	0.451900121	-0.001387253
MA0646.1_GCM1	6.52E-05	1.46E-04	-0.015248942
MA0647.1_GRHL1	0.080789331	0.106432361	-0.004671604
MA0648.1_GSC	3.52E-10	1.91E-09	-0.027624058
MA0649.1_HEY2	0.003045796	0.005089512	0.009117185
MA0650.1_HOXA13	3.74E-09	1.76E-08	-0.01106637
MA0651.1_HOXC11	0.012771436	0.019107652	-0.008128483
MA0652.1_IRF8	1.44E-08	6.46E-08	0.018806626
MA0653.1_IRF9	1.26E-07	4.26E-07	0.0157742
MA0654.1_ISX	6.29E-08	2.36E-07	-0.018398187
MA0655.1_JDP2	0.001076305	0.001932343	0.014584416
MA0656.1_JDP2(var.2)	5.39E-14	7.71E-13	-0.031980318
MA0657.1_KLF13	0.097635158	0.12604405	0.004444753
MA0658.1_LHX6	5.09E-06	1.43E-05	-0.017775704
MA0659.1_MAFG	4.05E-05	9.41E-05	-0.011881625
MA0660.1_MEF2B	6.22E-06	1.73E-05	0.013545485
MA0661.1_MEOX1	6.84E-06	1.89E-05	-0.013876762
MA0662.1_MIXL1	6.73E-13	6.84E-12	-0.023612802
MA0663.1_MLX	2.74E-04	5.40E-04	-0.018418936
MA0664.1_MLXIPL	4.53E-04	8.61E-04	-0.018033199
MA0665.1_MSC	2.68E-05	6.52E-05	0.008104457
MA0666.1_MSX1	3.02E-04	5.88E-04	-0.011606976
MA0667.1_MYF6	0.002875642	0.004868411	0.00606897
MA0668.1_NEUROD2	0.020792682	0.0302867	0.007499347
MA0669.1_NEUROG2	6.77E-08	2.51E-07	0.014651561
MA0670.1_NFIA	2.98E-07	9.74E-07	-0.010136882
MA0671.1_NFIX	0.542237172	0.578186597	-0.00160446
MA0672.1_NKX2-3	0.127374488	0.160675007	-0.003266985
MA0673.1_NKX2-8	0.046061398	0.063498927	0.004173937
MA0674.1_NKX6-1	1.71E-10	9.75E-10	-0.021559993
MA0675.1_NKX6-2	1.71E-10	9.75E-10	-0.021559993
MA0678.1_OLIG2	0.444014842	0.482787969	0.00203949
MA0679.1_ONECUT1	0.003828614	0.006370021	-0.008892269
MA0680.1_PAX7	4.01E-05	9.39E-05	-0.014861036
MA0683.1_POU4F2	4.54E-05	1.05E-04	-0.007200126
MA0684.1_RUNX3	1.31E-10	8.22E-10	0.013165819
MA0685.1_SP4	3.85E-08	1.55E-07	-0.008597912
MA0686.1_SPDEF	1.41E-04	2.86E-04	-0.01049859
MA0687.1_SPIC	0.153140838	0.189462703	0.0026514
MA0688.1_TBX2	2.52E-10	1.39E-09	0.01415426
MA0689.1_TBX20	2.41E-09	1.19E-08	0.011896222
MA0690.1_TBX21	8.17E-13	7.89E-12	0.015266089
MA0691.1_TFAP4	0.334029833	0.381456278	0.001709874
MA0692.1_TFEB	0.462511657	0.500082632	-0.002662931
MA0694.1_ZBTB7B	0.001134668	0.002018349	-0.007395919
MA0695.1_ZBTB7C	0.025449686	0.03679243	-0.00422012
MA0696.1_ZIC1	1.35E-09	6.92E-09	0.01134393
MA0697.1_ZIC3	0.05272465	0.071159842	0.00310635
MA0698.1_ZBTB18	3.62E-15	6.65E-14	0.018589138
MA0699.1_LBX2	2.68E-08	1.16E-07	-0.01797944
MA0700.1_LHX2	1.38E-06	4.21E-06	-0.017722105
MA0701.1_LHX9	6.29E-08	2.36E-07	-0.018398187
MA0702.1_LMX1A	3.44E-13	3.79E-12	-0.021953673
MA0703.1_LMX1B	3.77E-08	1.53E-07	-0.01821441
MA0706.1_MEOX2	1.51E-07	5.06E-07	-0.011544544
MA0707.1_MNX1	1.57E-09	7.87E-09	-0.013856247
MA0708.1_MSX2	0.009803588	0.014957253	-0.0070298
MA0710.1_NOTO	3.04E-09	1.45E-08	-0.023093027
MA0711.1_OTX1	1.58E-10	9.36E-10	-0.042486188
MA0712.1_OTX2	3.45E-12	2.90E-11	-0.024930815
MA0713.1_PHOX2A	3.79E-12	3.11E-11	-0.016933816
MA0714.1_PITX3	7.96E-09	3.61E-08	-0.019950035
MA0715.1_PROP1	1.98E-13	2.39E-12	-0.019195085
MA0716.1_PRRX1	6.29E-08	2.36E-07	-0.018398187
MA0717.1_RAX2	6.29E-08	2.36E-07	-0.018398187
MA0718.1_RAX	9.25E-08	3.28E-07	-0.014826779
MA0719.1_RHOXF1	1.73E-05	4.44E-05	-0.012432384
MA0721.1_UNCX	2.82E-11	2.05E-10	-0.025322185
MA0722.1_VAX1	2.33E-05	5.77E-05	-0.013982925
MA0723.1_VAX2	2.33E-05	5.77E-05	-0.013982925
MA0724.1_VENTX	0.006324768	0.010005576	-0.012007562
MA0725.1_VSX1	0.11607844	0.148365159	-0.005425212
MA0726.1_VSX2	0.005837362	0.009272518	-0.007604554
MA0727.1_NR3C2	0.599358843	0.637334748	0.001354209
MA0729.1_RARA	4.52E-10	2.42E-09	0.014230153
MA0730.1_RARA(var.2)	1.82E-05	4.65E-05	0.010571066
MA0731.1_BCL6B	2.98E-08	1.27E-07	-0.011796185
MA0732.1_EGR3	0.051668301	0.069978822	0.002701265
MA0733.1_EGR4	7.08E-04	0.001326891	0.006257767
MA0734.1_GLI2	5.70E-05	1.31E-04	0.010153087
MA0735.1_GLIS1	3.51E-05	8.36E-05	-0.014198333
MA0736.1_GLIS2	0.518425503	0.554327547	0.001390875
MA0737.1_GLIS3	0.004635495	0.00749163	-0.007084997
MA0738.1_HIC2	4.99E-06	1.42E-05	0.009906168
MA0740.1_KLF14	0.014505083	0.02153447	-0.004458929
MA0741.1_KLF16	0.173493829	0.212598787	-0.001298052
MA0743.1_SCRT1	2.51E-06	7.41E-06	0.008683555
MA0744.1_SCRT2	0.210946353	0.254454038	-0.002056436
MA0745.1_SNAI2	4.49E-23	5.77E-21	0.02902096
MA0746.1_SP3	0.38184352	0.427222025	-8.40E-04
MA0747.1_SP8	0.167894086	0.206392093	0.001626229
MA0748.1_YY2	7.32E-18	1.88E-16	-0.038176797
MA0749.1_ZBED1	8.63E-04	0.001572144	-0.019654081
MA0750.1_ZBTB7A	0.612631038	0.649658188	0.001267858
MA0751.1_ZIC4	2.49E-09	1.22E-08	0.010557524
MA0752.1_ZNF410	0.077208276	0.102062995	-0.003972315
MA0753.1_ZNF740	0.002152006	0.003691886	0.007770114
MA0754.1_CUX1	0.483810133	0.521650032	-0.002621344
MA0755.1_CUX2	0.005185414	0.00827095	-0.01048267
MA0756.1_ONECUT2	2.75E-05	6.64E-05	-0.012465392
MA0757.1_ONECUT3	1.59E-05	4.17E-05	-0.010840962
MA0758.1_E2F7	1.72E-16	3.49E-15	-0.027674218
MA0759.1_ELK3	3.97E-04	7.58E-04	-0.008913175
MA0760.1_ERF	0.445902734	0.483478807	-0.001509064
MA0761.1_ETV1	6.37E-05	1.44E-04	-0.010737031
MA0762.1_ETV2	0.306608947	0.35119007	-0.001917851
MA0763.1_ETV3	0.009776467	0.014957253	-0.005520904
MA0764.1_ETV4	0.010540445	0.01595534	-0.006664687
MA0765.1_ETV5	1.06E-05	2.87E-05	-0.013146473
MA0766.1_GATA5	0.048901685	0.066699824	0.004710492
MA0767.1_GCM2	4.25E-09	1.97E-08	-0.03040493
MA0768.1_LEF1	0.349615593	0.393444953	0.001793522
MA0770.1_HSF2	0.15494247	0.191079212	-0.002419193
MA0771.1_HSF4	0.747493068	0.77771516	7.89E-04
MA0772.1_IRF7	0.114752297	0.147157431	0.00327653
MA0773.1_MEF2D	2.36E-05	5.81E-05	0.011112713
MA0774.1_MEIS2	0.088456761	0.116137108	0.003301483
MA0775.1_MEIS3	0.009795295	0.014957253	0.006061302
MA0776.1_MYBL1	0.392467444	0.437839402	-0.00391858
MA0777.1_MYBL2	0.070171233	0.093079368	-0.008014398
MA0778.1_NFKB2	0.089189941	0.116394188	0.009520795
MA0779.1_PAX1	0.066315023	0.088267583	0.004654259
MA0780.1_PAX3	3.91E-07	1.25E-06	-0.019186989
MA0781.1_PAX9	0.039107021	0.054892036	0.0049772
MA0782.1_PKNOX1	1.80E-19	6.93E-18	0.030117514
MA0783.1_PKNOX2	4.86E-15	8.16E-14	0.021398292
MA0784.1_POU1F1	9.79E-08	3.38E-07	0.009297611
MA0785.1_POU2F1	1.72E-10	9.75E-10	0.013124312
MA0786.1_POU3F1	8.60E-08	3.07E-07	0.009619165
MA0787.1_POU3F2	5.21E-12	4.11E-11	0.013535128
MA0788.1_POU3F3	0.042373907	0.058835712	0.003101957
MA0789.1_POU3F4	1.86E-07	6.13E-07	0.011966435
MA0790.1_POU4F1	2.27E-10	1.27E-09	-0.010406419
MA0791.1_POU4F3	5.17E-08	2.04E-07	-0.009836139
MA0792.1_POU5F1B	1.36E-10	8.32E-10	0.016504554
MA0793.1_POU6F2	0.648785712	0.686113109	8.47E-04
MA0794.1_PROX1	0.004051232	0.006711483	-0.008864371
MA0795.1_SMAD3	0.219244969	0.263640367	-0.004928558
MA0796.1_TGIF1	1.44E-13	1.79E-12	0.021391843
MA0797.1_TGIF2	1.08E-12	1.02E-11	0.020687253
MA0798.1_RFX3	0.248221853	0.292785833	0.003677672
MA0799.1_RFX4	0.766317054	0.793025155	7.93E-04
MA0800.1_EOMES	3.72E-08	1.53E-07	0.012129312
MA0801.1_MGA	5.58E-22	4.31E-20	0.027327644
MA0802.1_TBR1	7.59E-13	7.51E-12	0.013964321
MA0803.1_TBX15	5.58E-22	4.31E-20	0.027327644
MA0804.1_TBX19	0.002914228	0.004912193	0.009127955
MA0805.1_TBX1	8.75E-21	4.83E-19	0.026417604
MA0806.1_TBX4	1.57E-17	3.58E-16	0.026044219
MA0807.1_TBX5	1.57E-17	3.58E-16	0.026044219
MA0808.1_TEAD3	0.820812081	0.839096565	-4.42E-04
MA0809.1_TEAD4	0.189891433	0.229774586	-0.003020421
MA0810.1_TFAP2A(var.2)	0.089255646	0.116394188	0.00243691
MA0811.1_TFAP2B	0.770741894	0.79547158	4.85E-04
MA0812.1_TFAP2B(var.2)	0.119733659	0.152030238	-0.002353923
MA0813.1_TFAP2B(var.3)	0.253822706	0.29689565	-0.001939439
MA0814.1_TFAP2C(var.2)	0.053138695	0.071468768	-0.003414757
MA0815.1_TFAP2C(var.3)	0.713252877	0.748140246	6.44E-04
MA0817.1_BHLHE23	1.35E-04	2.81E-04	0.011786486
MA0818.1_BHLHE22	0.007364116	0.011415859	0.008931884
MA0819.1_CLOCK	0.038978791	0.054892036	0.007496673
MA0820.1_FIGLA	1.85E-18	5.33E-17	0.020464584
MA0821.1_HES5	3.82E-04	7.34E-04	0.009807273
MA0822.1_HES7	1.23E-04	2.59E-04	0.011410113
MA0823.1_HEY1	8.07E-05	1.77E-04	0.0115574
MA0824.1_ID4	6.72E-25	1.30E-22	0.033391752
MA0825.1_MNT	0.821705963	0.839096565	6.13E-04
MA0826.1_OLIG1	0.001171271	0.002068081	0.011096442
MA0827.1_OLIG3	0.220574616	0.264415534	0.003223812
MA0828.1_SREBF2(var.2)	0.057981839	0.077442871	-0.007405404
MA0830.1_TCF4	1.24E-20	5.98E-19	0.028116062
MA0831.1_TFE3	0.011828918	0.01783579	-0.009669314
MA0833.1_ATF4	0.009642796	0.014888477	-0.006065169
MA0834.1_ATF7	2.53E-14	3.75E-13	-0.037884262
MA0835.1_BATF3	1.55E-12	1.39E-11	-0.028412995
MA0836.1_CEBPD	2.72E-04	0.000538111	-0.013990338
MA0837.1_CEBPE	0.007073561	0.01105423	0.008200872
MA0838.1_CEBPG	0.019447454	0.028434535	-0.005774277
MA0839.1_CREB3L1	0.09419739	0.12242489	-0.004721748
MA0841.1_NFE2	9.25E-04	0.001668299	0.014502162
MA0842.1_NRL	0.761488205	0.790146363	-5.53E-04
MA0843.1_TEF	0.68938369	0.725073854	-0.001213405
MA0844.1_XBP1	3.15E-05	7.56E-05	-0.016146314
MA0845.1_FOXB1	0.095168236	0.123271607	0.00244477
MA0846.1_FOXC2	2.56E-04	5.09E-04	-0.005950364
MA0847.1_FOXD2	1.18E-04	2.49E-04	-0.007006664
MA0848.1_FOXO4	1.18E-04	2.49E-04	-0.007006664
MA0849.1_FOXO6	1.18E-04	2.49E-04	-0.007006664
MA0850.1_FOXP3	1.18E-04	2.49E-04	-0.007006664
MA0855.1_RXRB	0.002490596	0.00425385	0.004683997
MA0856.1_RXRG	0.005051608	0.008090957	0.004160085
MA0861.1_TP73	6.79E-05	1.51E-04	0.01008689
MA0862.1_GMEB2	4.69E-08	1.87E-07	-0.038741539
MA0863.1_MTF1	0.886521538	0.893465571	3.82E-04
MA0864.1_E2F2	8.99E-12	6.94E-11	-0.032946513
MA0865.1_E2F8	1.35E-12	1.24E-11	-0.017379923
MA0866.1_SOX21	0.013841609	0.020628807	0.004580122
MA0867.1_SOX4	7.50E-04	0.00139557	0.005126992
MA0868.1_SOX8	0.43994753	0.479760977	0.001530026
MA0871.1_TFEC	0.410141779	0.452327791	0.002975681
MA0872.1_TFAP2A(var.3)	0.964761811	0.967267686	-7.25E-05
MA0873.1_HOXD12	0.735007775	0.766791895	8.91E-04
MA0875.1_BARX1	0.004302625	0.00706729	-0.008747042
MA0876.1_BSX	3.02E-04	5.88E-04	-0.011606976
MA0878.1_CDX1	3.06E-08	1.29E-07	-0.008312746
MA0882.1_DLX6	0.303606884	0.349827633	-0.003294111
MA0884.1_DUXA	0.004425439	0.007238218	-0.006352987
MA0886.1_EMX2	6.71E-05	1.50E-04	-0.013770478
MA0887.1_EVX1	1.64E-05	4.24E-05	-0.015966849
MA0888.1_EVX2	1.35E-04	2.81E-04	-0.015227039
MA0889.1_GBX1	2.19E-06	6.50E-06	-0.014512919
MA0890.1_GBX2	2.53E-04	5.07E-04	-0.010016491
MA0891.1_GSC2	7.41E-08	2.72E-07	-0.023429655
MA0892.1_GSX1	6.28E-11	4.18E-10	-0.017425291
MA0893.1_GSX2	6.67E-10	3.53E-09	-0.015159791
MA0894.1_HESX1	1.85E-07	6.13E-07	-0.016591664
MA0895.1_HMBOX1	0.186405531	0.226265833	-0.004045188
MA0899.1_HOXA10	3.32E-12	2.85E-11	-0.011390884
MA0900.1_HOXA2	0.002595113	0.004412835	-0.00808319
MA0901.1_HOXB13	2.75E-08	1.18E-07	-0.010552434
MA0902.1_HOXB2	5.62E-07	1.77E-06	-0.014645046
MA0903.1_HOXB3	2.35E-08	1.03E-07	-0.014960256
MA0905.1_HOXC10	0.0046386	0.00749163	-0.007297333
MA0906.1_HOXC12	0.00167438	0.002898254	-0.007558299
MA0907.1_HOXC13	0.04636145	0.063685124	-0.004435867
MA0908.1_HOXD11	1.04E-06	3.22E-06	-0.015346099
MA0909.1_HOXD13	1.12E-06	3.44E-06	-0.010178735
MA0914.1_ISL2	7.65E-04	0.001412622	-0.011014341
