# Supplementary material for: Extensive evaluation of ATAC-seq protocols for native or formaldehyde-fixed nuclei
Source: BMC Genomics. 2022 Mar 17;23:214. doi: 10.1186/s12864-021-08266-x (PMC8928671; doi:10.1186/s12864-021-08266-x)
Supplement: Supplementary file 9 — Additional file 9: Supplementary Table S9. List of ATAC-seq primers used for PCR and corresponding samples for each barcode. The Nextera N5 primer (Ad1_noMX) and the N7 primer “Ad2.1” and other N7 primer sequences (besides the barcodes) were obtained from [5]. Column 1 (“Name”) indicates the name we used for each primer. Column 2 (“Barcode in Fastq”) shows the sequence returned by the sequencer for that particular primer. Column 3 (“Oligo”) shows the sequence of the primers. Columns 4-11 specify the sample ID, buffer, transposition temperature, enzyme source, fixation state, nuclei input, replicate ID, and sample type for each sample indexed by the corresponding barcode. [file 12864_2021_8266_MOESM9_ESM.csv]

Name	Barcode in Fastq	Oligo	Sample_ID	Buffer	Temp	Tn5	Fixation_State	Input	Replicate	Sample_Type
Ad1_noMX	NA	AATGATACGGCGACCACCGAGATCTACACTCGTCGGCAGCGTCAGATGTG	NA	NA	NA	NA	NA	NA	NA	NA
N7-1	GAATGCCTTG	CAAGCAGAAGACGGCATACGAGATcaaggcattcGTCTCGTGGGCTCGGAGATGT	A1	Nextera_TD	37C	Nextera_Tn5	Native	20k	Rep1	GM12878
N7-2	CGGACTGGCC	CAAGCAGAAGACGGCATACGAGATggccagtccgGTCTCGTGGGCTCGGAGATGT	A2	Omni_TD	37C	Nextera_Tn5	Native	20k	Rep1	GM12878
N7-3	CTGGCAGCGG	CAAGCAGAAGACGGCATACGAGATccgctgccagGTCTCGTGGGCTCGGAGATGT	A3	THS_TD	37C	Nextera_Tn5	Native	20k	Rep1	GM12878
N7-4	TCATCAGCCA	CAAGCAGAAGACGGCATACGAGATtggctgatgaGTCTCGTGGGCTCGGAGATGT	A4	Nextera_TD	37C	Homemade_Tn5	Native	20k	Rep1	GM12878
N7-5	TAACCAGTTA	CAAGCAGAAGACGGCATACGAGATtaactggttaGTCTCGTGGGCTCGGAGATGT	A5	Omni_TD	37C	Homemade_Tn5	Native	20k	Rep1	GM12878
N7-6	AGCTCATTCG	CAAGCAGAAGACGGCATACGAGATcgaatgagctGTCTCGTGGGCTCGGAGATGT	A6	THS_TD	37C	Homemade_Tn5	Native	20k	Rep1	GM12878
N7-7	CAACGGTCTT	CAAGCAGAAGACGGCATACGAGATaagaccgttgGTCTCGTGGGCTCGGAGATGT	A7	Nextera_TD	55C	Nextera_Tn5	Native	20k	Rep1	GM12878
N7-8	TGGTATCAGA	CAAGCAGAAGACGGCATACGAGATtctgataccaGTCTCGTGGGCTCGGAGATGT	A8	Omni_TD	55C	Nextera_Tn5	Native	20k	Rep1	GM12878
N7-9	GGTAACTACG	CAAGCAGAAGACGGCATACGAGATcgtagttaccGTCTCGTGGGCTCGGAGATGT	A9	THS_TD	55C	Nextera_Tn5	Native	20k	Rep1	GM12878
N7-10	CTTCAGGCCA	CAAGCAGAAGACGGCATACGAGATtggcctgaagGTCTCGTGGGCTCGGAGATGT	A10	Nextera_TD	55C	Homemade_Tn5	Native	20k	Rep1	GM12878
N7-11	ATCCTTCAAC	CAAGCAGAAGACGGCATACGAGATgttgaaggatGTCTCGTGGGCTCGGAGATGT	A11	Omni_TD	55C	Homemade_Tn5	Native	20k	Rep1	GM12878
N7-12	TGATTGAATG	CAAGCAGAAGACGGCATACGAGATcattcaatcaGTCTCGTGGGCTCGGAGATGT	A12	THS_TD	55C	Homemade_Tn5	Native	20k	Rep1	GM12878
N7-13	TGCTTAGCGA	CAAGCAGAAGACGGCATACGAGATtcgctaagcaGTCTCGTGGGCTCGGAGATGT	B1	Nextera_TD	37C	Nextera_Tn5	Native	20k	Rep2	GM12878
N7-14	CGAGTTCGCC	CAAGCAGAAGACGGCATACGAGATggcgaactcgGTCTCGTGGGCTCGGAGATGT	B2	Omni_TD	37C	Nextera_Tn5	Native	20k	Rep2	GM12878
N7-15	CGGCATCTTG	CAAGCAGAAGACGGCATACGAGATcaagatgccgGTCTCGTGGGCTCGGAGATGT	B3	THS_TD	37C	Nextera_Tn5	Native	20k	Rep2	GM12878
N7-16	TCAACGAGGT	CAAGCAGAAGACGGCATACGAGATacctcgttgaGTCTCGTGGGCTCGGAGATGT	B4	Nextera_TD	37C	Homemade_Tn5	Native	20k	Rep2	GM12878
N7-17	GGTCTAGGAA	CAAGCAGAAGACGGCATACGAGATttcctagaccGTCTCGTGGGCTCGGAGATGT	B5	Omni_TD	37C	Homemade_Tn5	Native	20k	Rep2	GM12878
N7-18	AAGTCAACGG	CAAGCAGAAGACGGCATACGAGATccgttgacttGTCTCGTGGGCTCGGAGATGT	B6	THS_TD	37C	Homemade_Tn5	Native	20k	Rep2	GM12878
N7-19	TAACCAATCG	CAAGCAGAAGACGGCATACGAGATcgattggttaGTCTCGTGGGCTCGGAGATGT	B7	Nextera_TD	55C	Nextera_Tn5	Native	20k	Rep2	GM12878
N7-20	ATCGGCTTGA	CAAGCAGAAGACGGCATACGAGATtcaagccgatGTCTCGTGGGCTCGGAGATGT	B8	Omni_TD	55C	Nextera_Tn5	Native	20k	Rep2	GM12878
N7-21	CAATCTCAAT	CAAGCAGAAGACGGCATACGAGATattgagattgGTCTCGTGGGCTCGGAGATGT	B9	THS_TD	55C	Nextera_Tn5	Native	20k	Rep2	GM12878
N7-22	CAGTTGCTTG	CAAGCAGAAGACGGCATACGAGATcaagcaactgGTCTCGTGGGCTCGGAGATGT	B10	Nextera_TD	55C	Homemade_Tn5	Native	20k	Rep2	GM12878
N7-23	ATGCTAACCT	CAAGCAGAAGACGGCATACGAGATaggttagcatGTCTCGTGGGCTCGGAGATGT	B11	Omni_TD	55C	Homemade_Tn5	Native	20k	Rep2	GM12878
N7-24	CGGATCTCCG	CAAGCAGAAGACGGCATACGAGATcggagatccgGTCTCGTGGGCTCGGAGATGT	B12	THS_TD	55C	Homemade_Tn5	Native	20k	Rep2	GM12878
N7-25	TGACGCGACC	CAAGCAGAAGACGGCATACGAGATggtcgcgtcaGTCTCGTGGGCTCGGAGATGT	C1	Nextera_TD	37C	Nextera_Tn5	Native	20k	Rep3	GM12878
N7-26	TCTGACGAAC	CAAGCAGAAGACGGCATACGAGATgttcgtcagaGTCTCGTGGGCTCGGAGATGT	C2	Omni_TD	37C	Nextera_Tn5	Native	20k	Rep3	GM12878
N7-27	GATCATGATA	CAAGCAGAAGACGGCATACGAGATtatcatgatcGTCTCGTGGGCTCGGAGATGT	C3	THS_TD	37C	Nextera_Tn5	Native	20k	Rep3	GM12878
N7-28	TTCTCTACGA	CAAGCAGAAGACGGCATACGAGATtcgtagagaaGTCTCGTGGGCTCGGAGATGT	C4	Nextera_TD	37C	Homemade_Tn5	Native	20k	Rep3	GM12878
N7-29	TACGCAGGTT	CAAGCAGAAGACGGCATACGAGATaacctgcgtaGTCTCGTGGGCTCGGAGATGT	C5	Omni_TD	37C	Homemade_Tn5	Native	20k	Rep3	GM12878
N7-30	TGCGAATCGG	CAAGCAGAAGACGGCATACGAGATccgattcgcaGTCTCGTGGGCTCGGAGATGT	C6	THS_TD	37C	Homemade_Tn5	Native	20k	Rep3	GM12878
N7-31	CTAAGAGTTA	CAAGCAGAAGACGGCATACGAGATtaactcttagGTCTCGTGGGCTCGGAGATGT	C7	Nextera_TD	55C	Nextera_Tn5	Native	20k	Rep3	GM12878
N7-32	TCCATACCTG	CAAGCAGAAGACGGCATACGAGATcaggtatggaGTCTCGTGGGCTCGGAGATGT	C8	Omni_TD	55C	Nextera_Tn5	Native	20k	Rep3	GM12878
N7-33	ACCGGTCTGC	CAAGCAGAAGACGGCATACGAGATgcagaccggtGTCTCGTGGGCTCGGAGATGT	C9	THS_TD	55C	Nextera_Tn5	Native	20k	Rep3	GM12878
N7-34	TAGAACCTCC	CAAGCAGAAGACGGCATACGAGATggaggttctaGTCTCGTGGGCTCGGAGATGT	C10	Nextera_TD	55C	Homemade_Tn5	Native	20k	Rep3	GM12878
N7-35	TGACCATCAG	CAAGCAGAAGACGGCATACGAGATctgatggtcaGTCTCGTGGGCTCGGAGATGT	C11	Omni_TD	55C	Homemade_Tn5	Native	20k	Rep3	GM12878
N7-36	GACTCGAGGA	CAAGCAGAAGACGGCATACGAGATtcctcgagtcGTCTCGTGGGCTCGGAGATGT	C12	THS_TD	55C	Homemade_Tn5	Native	20k	Rep3	GM12878
N7-73	AAGATCAGTT	CAAGCAGAAGACGGCATACGAGATaactgatcttGTCTCGTGGGCTCGGAGATGT	D1	Nextera_TD	37C	Nextera_Tn5	Native	20k	Rep4	GM12878
N7-74	ATCCGAACGG	CAAGCAGAAGACGGCATACGAGATccgttcggatGTCTCGTGGGCTCGGAGATGT	D2	Omni_TD	37C	Nextera_Tn5	Native	20k	Rep4	GM12878
N7-75	CTGCGCTGGT	CAAGCAGAAGACGGCATACGAGATaccagcgcagGTCTCGTGGGCTCGGAGATGT	D3	THS_TD	37C	Nextera_Tn5	Native	20k	Rep4	GM12878
N7-76	TGCCATGGAA	CAAGCAGAAGACGGCATACGAGATttccatggcaGTCTCGTGGGCTCGGAGATGT	D4	Nextera_TD	37C	Homemade_Tn5	Native	20k	Rep4	GM12878
N7-77	AGCTGAACGC	CAAGCAGAAGACGGCATACGAGATgcgttcagctGTCTCGTGGGCTCGGAGATGT	D5	Omni_TD	37C	Homemade_Tn5	Native	20k	Rep4	GM12878
N7-78	GAGACGTTCT	CAAGCAGAAGACGGCATACGAGATagaacgtctcGTCTCGTGGGCTCGGAGATGT	D6	THS_TD	37C	Homemade_Tn5	Native	20k	Rep4	GM12878
N7-79	CTGACTACTT	CAAGCAGAAGACGGCATACGAGATaagtagtcagGTCTCGTGGGCTCGGAGATGT	D7	Nextera_TD	55C	Nextera_Tn5	Native	20k	Rep4	GM12878
N7-80	CGCCGATATC	CAAGCAGAAGACGGCATACGAGATgatatcggcgGTCTCGTGGGCTCGGAGATGT	D8	Omni_TD	55C	Nextera_Tn5	Native	20k	Rep4	GM12878
N7-81	TGGATCGTTA	CAAGCAGAAGACGGCATACGAGATtaacgatccaGTCTCGTGGGCTCGGAGATGT	D9	THS_TD	55C	Nextera_Tn5	Native	20k	Rep4	GM12878
N7-82	GTACCTGAAT	CAAGCAGAAGACGGCATACGAGATattcaggtacGTCTCGTGGGCTCGGAGATGT	D10	Nextera_TD	55C	Homemade_Tn5	Native	20k	Rep4	GM12878
N7-83	GAATTCTCCA	CAAGCAGAAGACGGCATACGAGATtggagaattcGTCTCGTGGGCTCGGAGATGT	D11	Omni_TD	55C	Homemade_Tn5	Native	20k	Rep4	GM12878
N7-84	AGACCAGGTT	CAAGCAGAAGACGGCATACGAGATaacctggtctGTCTCGTGGGCTCGGAGATGT	D12	THS_TD	55C	Homemade_Tn5	Native	20k	Rep4	GM12878
N7-37	GCATTAGGCG	CAAGCAGAAGACGGCATACGAGATcgcctaatgcGTCTCGTGGGCTCGGAGATGT	E1	Nextera_TD	37C	Nextera_Tn5	Fixed	20k	Rep1	GM12878
N7-38	GGACTTATGG	CAAGCAGAAGACGGCATACGAGATccataagtccGTCTCGTGGGCTCGGAGATGT	E2	Omni_TD	37C	Nextera_Tn5	Fixed	20k	Rep1	GM12878
N7-39	TTGGTTCTCA	CAAGCAGAAGACGGCATACGAGATtgagaaccaaGTCTCGTGGGCTCGGAGATGT	E3	THS_TD	37C	Nextera_Tn5	Fixed	20k	Rep1	GM12878
N7-40	TAATTCCGGT	CAAGCAGAAGACGGCATACGAGATaccggaattaGTCTCGTGGGCTCGGAGATGT	E4	Nextera_TD	37C	Homemade_Tn5	Fixed	20k	Rep1	GM12878
N7-41	CTACTGCAAG	CAAGCAGAAGACGGCATACGAGATcttgcagtagGTCTCGTGGGCTCGGAGATGT	E5	Omni_TD	37C	Homemade_Tn5	Fixed	20k	Rep1	GM12878
N7-42	CGTAGCCGTA	CAAGCAGAAGACGGCATACGAGATtacggctacgGTCTCGTGGGCTCGGAGATGT	E6	THS_TD	37C	Homemade_Tn5	Fixed	20k	Rep1	GM12878
N7-43	TTGACTTCGT	CAAGCAGAAGACGGCATACGAGATacgaagtcaaGTCTCGTGGGCTCGGAGATGT	E7	Nextera_TD	55C	Nextera_Tn5	Fixed	20k	Rep1	GM12878
N7-44	TCAGCGCAAT	CAAGCAGAAGACGGCATACGAGATattgcgctgaGTCTCGTGGGCTCGGAGATGT	E8	Omni_TD	55C	Nextera_Tn5	Fixed	20k	Rep1	GM12878
N7-45	ATATGGTACC	CAAGCAGAAGACGGCATACGAGATggtaccatatGTCTCGTGGGCTCGGAGATGT	E9	THS_TD	55C	Nextera_Tn5	Fixed	20k	Rep1	GM12878
N7-46	TGCCGGTACC	CAAGCAGAAGACGGCATACGAGATggtaccggcaGTCTCGTGGGCTCGGAGATGT	E10	Nextera_TD	55C	Homemade_Tn5	Fixed	20k	Rep1	GM12878
N7-47	GGTACTTCCA	CAAGCAGAAGACGGCATACGAGATtggaagtaccGTCTCGTGGGCTCGGAGATGT	E11	Omni_TD	55C	Homemade_Tn5	Fixed	20k	Rep1	GM12878
N7-48	AATTGAGTTA	CAAGCAGAAGACGGCATACGAGATtaactcaattGTCTCGTGGGCTCGGAGATGT	E12	THS_TD	55C	Homemade_Tn5	Fixed	20k	Rep1	GM12878
N7-49	GCGGCGCAAG	CAAGCAGAAGACGGCATACGAGATcttgcgccgcGTCTCGTGGGCTCGGAGATGT	F1	Nextera_TD	37C	Nextera_Tn5	Fixed	20k	Rep2	GM12878
N7-50	AATACCTGCC	CAAGCAGAAGACGGCATACGAGATggcaggtattGTCTCGTGGGCTCGGAGATGT	F2	Omni_TD	37C	Nextera_Tn5	Fixed	20k	Rep2	GM12878
N7-51	AGCATACGGC	CAAGCAGAAGACGGCATACGAGATgccgtatgctGTCTCGTGGGCTCGGAGATGT	F3	THS_TD	37C	Nextera_Tn5	Fixed	20k	Rep2	GM12878
N7-52	GCCTCGGTAA	CAAGCAGAAGACGGCATACGAGATttaccgaggcGTCTCGTGGGCTCGGAGATGT	F4	Nextera_TD	37C	Homemade_Tn5	Fixed	20k	Rep2	GM12878
N7-53	ACGGACCTGC	CAAGCAGAAGACGGCATACGAGATgcaggtccgtGTCTCGTGGGCTCGGAGATGT	F5	Omni_TD	37C	Homemade_Tn5	Fixed	20k	Rep2	GM12878
N7-54	CATTCTGATG	CAAGCAGAAGACGGCATACGAGATcatcagaatgGTCTCGTGGGCTCGGAGATGT	F6	THS_TD	37C	Homemade_Tn5	Fixed	20k	Rep2	GM12878
N7-55	GCTTACTATA	CAAGCAGAAGACGGCATACGAGATtatagtaagcGTCTCGTGGGCTCGGAGATGT	F7	Nextera_TD	55C	Nextera_Tn5	Fixed	20k	Rep2	GM12878
N7-56	TCCAATGGTT	CAAGCAGAAGACGGCATACGAGATaaccattggaGTCTCGTGGGCTCGGAGATGT	F8	Omni_TD	55C	Nextera_Tn5	Fixed	20k	Rep2	GM12878
N7-57	ACGGTAATTG	CAAGCAGAAGACGGCATACGAGATcaattaccgtGTCTCGTGGGCTCGGAGATGT	F9	THS_TD	55C	Nextera_Tn5	Fixed	20k	Rep2	GM12878
Ad2.1_TAAGGCGA	TAAGGCGA	CAAGCAGAAGACGGCATACGAGATtcgccttaGTCTCGTGGGCTCGGAGATGT	F10	Nextera_TD	55C	Homemade_Tn5	Fixed	20k	Rep2	GM12878
N7-59	GGTTAGTTGG	CAAGCAGAAGACGGCATACGAGATccaactaaccGTCTCGTGGGCTCGGAGATGT	F11	Omni_TD	55C	Homemade_Tn5	Fixed	20k	Rep2	GM12878
N7-60	CTGCATTACG	CAAGCAGAAGACGGCATACGAGATcgtaatgcagGTCTCGTGGGCTCGGAGATGT	F12	THS_TD	55C	Homemade_Tn5	Fixed	20k	Rep2	GM12878
N7-61	TGCGGCCTGG	CAAGCAGAAGACGGCATACGAGATccaggccgcaGTCTCGTGGGCTCGGAGATGT	G1	Nextera_TD	37C	Nextera_Tn5	Fixed	20k	Rep3	GM12878
N7-62	CATCTATTCG	CAAGCAGAAGACGGCATACGAGATcgaatagatgGTCTCGTGGGCTCGGAGATGT	G2	Omni_TD	37C	Nextera_Tn5	Fixed	20k	Rep3	GM12878
N7-63	GCAGCTGATT	CAAGCAGAAGACGGCATACGAGATaatcagctgcGTCTCGTGGGCTCGGAGATGT	G3	THS_TD	37C	Nextera_Tn5	Fixed	20k	Rep3	GM12878
N7-64	ATATCTTCCG	CAAGCAGAAGACGGCATACGAGATcggaagatatGTCTCGTGGGCTCGGAGATGT	G4	Nextera_TD	37C	Homemade_Tn5	Fixed	20k	Rep3	GM12878
N7-65	GTCGTACGCG	CAAGCAGAAGACGGCATACGAGATcgcgtacgacGTCTCGTGGGCTCGGAGATGT	G5	Omni_TD	37C	Homemade_Tn5	Fixed	20k	Rep3	GM12878
N7-66	TTGATGCCTC	CAAGCAGAAGACGGCATACGAGATgaggcatcaaGTCTCGTGGGCTCGGAGATGT	G6	THS_TD	37C	Homemade_Tn5	Fixed	20k	Rep3	GM12878
N7-67	TTGGAACTGG	CAAGCAGAAGACGGCATACGAGATccagttccaaGTCTCGTGGGCTCGGAGATGT	G7	Nextera_TD	55C	Nextera_Tn5	Fixed	20k	Rep3	GM12878
N7-68	GGAGAATGGC	CAAGCAGAAGACGGCATACGAGATgccattctccGTCTCGTGGGCTCGGAGATGT	G8	Omni_TD	55C	Nextera_Tn5	Fixed	20k	Rep3	GM12878
N7-69	TTCCATTCTT	CAAGCAGAAGACGGCATACGAGATaagaatggaaGTCTCGTGGGCTCGGAGATGT	G9	THS_TD	55C	Nextera_Tn5	Fixed	20k	Rep3	GM12878
N7-70	CCGAAGGTTA	CAAGCAGAAGACGGCATACGAGATtaaccttcggGTCTCGTGGGCTCGGAGATGT	G10	Nextera_TD	55C	Homemade_Tn5	Fixed	20k	Rep3	GM12878
N7-71	CCGGCTGAGC	CAAGCAGAAGACGGCATACGAGATgctcagccggGTCTCGTGGGCTCGGAGATGT	G11	Omni_TD	55C	Homemade_Tn5	Fixed	20k	Rep3	GM12878
N7-72	ACGAGGAGCC	CAAGCAGAAGACGGCATACGAGATggctcctcgtGTCTCGTGGGCTCGGAGATGT	G12	THS_TD	55C	Homemade_Tn5	Fixed	20k	Rep3	GM12878
N7-85	CTAGCTTCTT	CAAGCAGAAGACGGCATACGAGATaagaagctagGTCTCGTGGGCTCGGAGATGT	H1	Nextera_TD	37C	Nextera_Tn5	Fixed	20k	Rep4	GM12878
N7-86	GGCAACCTTC	CAAGCAGAAGACGGCATACGAGATgaaggttgccGTCTCGTGGGCTCGGAGATGT	H2	Omni_TD	37C	Nextera_Tn5	Fixed	20k	Rep4	GM12878
N7-87	CCGTTAGCAA	CAAGCAGAAGACGGCATACGAGATttgctaacggGTCTCGTGGGCTCGGAGATGT	H3	THS_TD	37C	Nextera_Tn5	Fixed	20k	Rep4	GM12878
N7-88	GGCGTCTGCC	CAAGCAGAAGACGGCATACGAGATggcagacgccGTCTCGTGGGCTCGGAGATGT	H4	Nextera_TD	37C	Homemade_Tn5	Fixed	20k	Rep4	GM12878
N7-89	CGCGCAACCG	CAAGCAGAAGACGGCATACGAGATcggttgcgcgGTCTCGTGGGCTCGGAGATGT	H5	Omni_TD	37C	Homemade_Tn5	Fixed	20k	Rep4	GM12878
N7-90	AGTCTTAATT	CAAGCAGAAGACGGCATACGAGATaattaagactGTCTCGTGGGCTCGGAGATGT	H6	THS_TD	37C	Homemade_Tn5	Fixed	20k	Rep4	GM12878
N7-91	TAAGGAACGG	CAAGCAGAAGACGGCATACGAGATccgttccttaGTCTCGTGGGCTCGGAGATGT	H7	Nextera_TD	55C	Nextera_Tn5	Fixed	20k	Rep4	GM12878
N7-92	TCGTTCATTA	CAAGCAGAAGACGGCATACGAGATtaatgaacgaGTCTCGTGGGCTCGGAGATGT	H8	Omni_TD	55C	Nextera_Tn5	Fixed	20k	Rep4	GM12878
N7-93	ACTCCAGATT	CAAGCAGAAGACGGCATACGAGATaatctggagtGTCTCGTGGGCTCGGAGATGT	H9	THS_TD	55C	Nextera_Tn5	Fixed	20k	Rep4	GM12878
N7-94	CGATATATCT	CAAGCAGAAGACGGCATACGAGATagatatatcgGTCTCGTGGGCTCGGAGATGT	H10	Nextera_TD	55C	Homemade_Tn5	Fixed	20k	Rep4	GM12878
N7-95	GGCTGGCTCT	CAAGCAGAAGACGGCATACGAGATagagccagccGTCTCGTGGGCTCGGAGATGT	H11	Omni_TD	55C	Homemade_Tn5	Fixed	20k	Rep4	GM12878
N7-96	GGCGGATACC	CAAGCAGAAGACGGCATACGAGATggtatccgccGTCTCGTGGGCTCGGAGATGT	H12	THS_TD	55C	Homemade_Tn5	Fixed	20k	Rep4	GM12878
N7-1	GAATGCCTTG	CAAGCAGAAGACGGCATACGAGATcaaggcattcGTCTCGTGGGCTCGGAGATGT	A1_B1	Nextera_TD	37C	Nextera_Tn5	Native	20k	Rep1	Mouse_lung
N7-2	CGGACTGGCC	CAAGCAGAAGACGGCATACGAGATggccagtccgGTCTCGTGGGCTCGGAGATGT	A2_B1	Omni_TD	37C	Nextera_Tn5	Native	20k	Rep1	Mouse_lung
N7-3	CTGGCAGCGG	CAAGCAGAAGACGGCATACGAGATccgctgccagGTCTCGTGGGCTCGGAGATGT	A3_B1	THS_TD	37C	Nextera_Tn5	Native	20k	Rep1	Mouse_lung
N7-4	TCATCAGCCA	CAAGCAGAAGACGGCATACGAGATtggctgatgaGTCTCGTGGGCTCGGAGATGT	A4_B1	Nextera_TD	37C	Homemade_Tn5	Native	20k	Rep1	Mouse_lung
N7-5	TAACCAGTTA	CAAGCAGAAGACGGCATACGAGATtaactggttaGTCTCGTGGGCTCGGAGATGT	A5_B1	Omni_TD	37C	Homemade_Tn5	Native	20k	Rep1	Mouse_lung
N7-6	AGCTCATTCG	CAAGCAGAAGACGGCATACGAGATcgaatgagctGTCTCGTGGGCTCGGAGATGT	A6_B1	THS_TD	37C	Homemade_Tn5	Native	20k	Rep1	Mouse_lung
N7-7	CAACGGTCTT	CAAGCAGAAGACGGCATACGAGATaagaccgttgGTCTCGTGGGCTCGGAGATGT	C1_B1	Nextera_TD	55C	Nextera_Tn5	Native	20k	Rep1	Mouse_lung
N7-8	TGGTATCAGA	CAAGCAGAAGACGGCATACGAGATtctgataccaGTCTCGTGGGCTCGGAGATGT	C2_B1	Omni_TD	55C	Nextera_Tn5	Native	20k	Rep1	Mouse_lung
N7-9	GGTAACTACG	CAAGCAGAAGACGGCATACGAGATcgtagttaccGTCTCGTGGGCTCGGAGATGT	C3_B1	THS_TD	55C	Nextera_Tn5	Native	20k	Rep1	Mouse_lung
N7-10	CTTCAGGCCA	CAAGCAGAAGACGGCATACGAGATtggcctgaagGTCTCGTGGGCTCGGAGATGT	C4_B1	Nextera_TD	55C	Homemade_Tn5	Native	20k	Rep1	Mouse_lung
N7-11	ATCCTTCAAC	CAAGCAGAAGACGGCATACGAGATgttgaaggatGTCTCGTGGGCTCGGAGATGT	C5_B1	Omni_TD	55C	Homemade_Tn5	Native	20k	Rep1	Mouse_lung
N7-12	TGATTGAATG	CAAGCAGAAGACGGCATACGAGATcattcaatcaGTCTCGTGGGCTCGGAGATGT	C6_B1	THS_TD	55C	Homemade_Tn5	Native	20k	Rep1	Mouse_lung
N7-13	TGCTTAGCGA	CAAGCAGAAGACGGCATACGAGATtcgctaagcaGTCTCGTGGGCTCGGAGATGT	E1_B1	Nextera_TD	37C	Nextera_Tn5	Native	1k	Rep1	Mouse_lung
N7-14	CGAGTTCGCC	CAAGCAGAAGACGGCATACGAGATggcgaactcgGTCTCGTGGGCTCGGAGATGT	E2_B1	Omni_TD	37C	Nextera_Tn5	Native	1k	Rep1	Mouse_lung
N7-15	CGGCATCTTG	CAAGCAGAAGACGGCATACGAGATcaagatgccgGTCTCGTGGGCTCGGAGATGT	E3_B1	THS_TD	37C	Nextera_Tn5	Native	1k	Rep1	Mouse_lung
N7-16	TCAACGAGGT	CAAGCAGAAGACGGCATACGAGATacctcgttgaGTCTCGTGGGCTCGGAGATGT	E4_B1	Nextera_TD	37C	Homemade_Tn5	Native	1k	Rep1	Mouse_lung
N7-17	GGTCTAGGAA	CAAGCAGAAGACGGCATACGAGATttcctagaccGTCTCGTGGGCTCGGAGATGT	E5_B1	Omni_TD	37C	Homemade_Tn5	Native	1k	Rep1	Mouse_lung
N7-18	AAGTCAACGG	CAAGCAGAAGACGGCATACGAGATccgttgacttGTCTCGTGGGCTCGGAGATGT	E6_B1	THS_TD	37C	Homemade_Tn5	Native	1k	Rep1	Mouse_lung
N7-19	TAACCAATCG	CAAGCAGAAGACGGCATACGAGATcgattggttaGTCTCGTGGGCTCGGAGATGT	G1_B1	Nextera_TD	55C	Nextera_Tn5	Native	1k	Rep1	Mouse_lung
N7-20	ATCGGCTTGA	CAAGCAGAAGACGGCATACGAGATtcaagccgatGTCTCGTGGGCTCGGAGATGT	G2_B1	Omni_TD	55C	Nextera_Tn5	Native	1k	Rep1	Mouse_lung
N7-21	CAATCTCAAT	CAAGCAGAAGACGGCATACGAGATattgagattgGTCTCGTGGGCTCGGAGATGT	G3_B1	THS_TD	55C	Nextera_Tn5	Native	1k	Rep1	Mouse_lung
N7-22	CAGTTGCTTG	CAAGCAGAAGACGGCATACGAGATcaagcaactgGTCTCGTGGGCTCGGAGATGT	G4_B1	Nextera_TD	55C	Homemade_Tn5	Native	1k	Rep1	Mouse_lung
N7-23	ATGCTAACCT	CAAGCAGAAGACGGCATACGAGATaggttagcatGTCTCGTGGGCTCGGAGATGT	G5_B1	Omni_TD	55C	Homemade_Tn5	Native	1k	Rep1	Mouse_lung
N7-24	CGGATCTCCG	CAAGCAGAAGACGGCATACGAGATcggagatccgGTCTCGTGGGCTCGGAGATGT	G6_B1	THS_TD	55C	Homemade_Tn5	Native	1k	Rep1	Mouse_lung
N7-25	TGACGCGACC	CAAGCAGAAGACGGCATACGAGATggtcgcgtcaGTCTCGTGGGCTCGGAGATGT	A1_B2	Nextera_TD	37C	Nextera_Tn5	Native	20k	Rep2	Mouse_lung
N7-26	TCTGACGAAC	CAAGCAGAAGACGGCATACGAGATgttcgtcagaGTCTCGTGGGCTCGGAGATGT	A2_B2	Omni_TD	37C	Nextera_Tn5	Native	20k	Rep2	Mouse_lung
N7-27	GATCATGATA	CAAGCAGAAGACGGCATACGAGATtatcatgatcGTCTCGTGGGCTCGGAGATGT	A3_B2	THS_TD	37C	Nextera_Tn5	Native	20k	Rep2	Mouse_lung
N7-28	TTCTCTACGA	CAAGCAGAAGACGGCATACGAGATtcgtagagaaGTCTCGTGGGCTCGGAGATGT	A4_B2	Nextera_TD	37C	Homemade_Tn5	Native	20k	Rep2	Mouse_lung
N7-29	TACGCAGGTT	CAAGCAGAAGACGGCATACGAGATaacctgcgtaGTCTCGTGGGCTCGGAGATGT	A5_B2	Omni_TD	37C	Homemade_Tn5	Native	20k	Rep2	Mouse_lung
N7-30	TGCGAATCGG	CAAGCAGAAGACGGCATACGAGATccgattcgcaGTCTCGTGGGCTCGGAGATGT	A6_B2	THS_TD	37C	Homemade_Tn5	Native	20k	Rep2	Mouse_lung
N7-31	CTAAGAGTTA	CAAGCAGAAGACGGCATACGAGATtaactcttagGTCTCGTGGGCTCGGAGATGT	C1_B2	Nextera_TD	55C	Nextera_Tn5	Native	20k	Rep2	Mouse_lung
N7-32	TCCATACCTG	CAAGCAGAAGACGGCATACGAGATcaggtatggaGTCTCGTGGGCTCGGAGATGT	C2_B2	Omni_TD	55C	Nextera_Tn5	Native	20k	Rep2	Mouse_lung
N7-33	ACCGGTCTGC	CAAGCAGAAGACGGCATACGAGATgcagaccggtGTCTCGTGGGCTCGGAGATGT	C3_B2	THS_TD	55C	Nextera_Tn5	Native	20k	Rep2	Mouse_lung
N7-34	TAGAACCTCC	CAAGCAGAAGACGGCATACGAGATggaggttctaGTCTCGTGGGCTCGGAGATGT	C4_B2	Nextera_TD	55C	Homemade_Tn5	Native	20k	Rep2	Mouse_lung
N7-35	TGACCATCAG	CAAGCAGAAGACGGCATACGAGATctgatggtcaGTCTCGTGGGCTCGGAGATGT	C5_B2	Omni_TD	55C	Homemade_Tn5	Native	20k	Rep2	Mouse_lung
N7-36	GACTCGAGGA	CAAGCAGAAGACGGCATACGAGATtcctcgagtcGTCTCGTGGGCTCGGAGATGT	C6_B2	THS_TD	55C	Homemade_Tn5	Native	20k	Rep2	Mouse_lung
N7-37	GCATTAGGCG	CAAGCAGAAGACGGCATACGAGATcgcctaatgcGTCTCGTGGGCTCGGAGATGT	E1_B2	Nextera_TD	37C	Nextera_Tn5	Native	1k	Rep2	Mouse_lung
N7-38	GGACTTATGG	CAAGCAGAAGACGGCATACGAGATccataagtccGTCTCGTGGGCTCGGAGATGT	E2_B2	Omni_TD	37C	Nextera_Tn5	Native	1k	Rep2	Mouse_lung
N7-39	TTGGTTCTCA	CAAGCAGAAGACGGCATACGAGATtgagaaccaaGTCTCGTGGGCTCGGAGATGT	E3_B2	THS_TD	37C	Nextera_Tn5	Native	1k	Rep2	Mouse_lung
N7-40	TAATTCCGGT	CAAGCAGAAGACGGCATACGAGATaccggaattaGTCTCGTGGGCTCGGAGATGT	E4_B2	Nextera_TD	37C	Homemade_Tn5	Native	1k	Rep2	Mouse_lung
N7-41	CTACTGCAAG	CAAGCAGAAGACGGCATACGAGATcttgcagtagGTCTCGTGGGCTCGGAGATGT	E5_B2	Omni_TD	37C	Homemade_Tn5	Native	1k	Rep2	Mouse_lung
N7-42	CGTAGCCGTA	CAAGCAGAAGACGGCATACGAGATtacggctacgGTCTCGTGGGCTCGGAGATGT	E6_B2	THS_TD	37C	Homemade_Tn5	Native	1k	Rep2	Mouse_lung
N7-43	TTGACTTCGT	CAAGCAGAAGACGGCATACGAGATacgaagtcaaGTCTCGTGGGCTCGGAGATGT	G1_B2	Nextera_TD	55C	Nextera_Tn5	Native	1k	Rep2	Mouse_lung
N7-44	TCAGCGCAAT	CAAGCAGAAGACGGCATACGAGATattgcgctgaGTCTCGTGGGCTCGGAGATGT	G2_B2	Omni_TD	55C	Nextera_Tn5	Native	1k	Rep2	Mouse_lung
N7-45	ATATGGTACC	CAAGCAGAAGACGGCATACGAGATggtaccatatGTCTCGTGGGCTCGGAGATGT	G3_B2	THS_TD	55C	Nextera_Tn5	Native	1k	Rep2	Mouse_lung
N7-46	TGCCGGTACC	CAAGCAGAAGACGGCATACGAGATggtaccggcaGTCTCGTGGGCTCGGAGATGT	G4_B2	Nextera_TD	55C	Homemade_Tn5	Native	1k	Rep2	Mouse_lung
N7-47	GGTACTTCCA	CAAGCAGAAGACGGCATACGAGATtggaagtaccGTCTCGTGGGCTCGGAGATGT	G5_B2	Omni_TD	55C	Homemade_Tn5	Native	1k	Rep2	Mouse_lung
N7-48	AATTGAGTTA	CAAGCAGAAGACGGCATACGAGATtaactcaattGTCTCGTGGGCTCGGAGATGT	G6_B2	THS_TD	55C	Homemade_Tn5	Native	1k	Rep2	Mouse_lung
N7-73	AAGATCAGTT	CAAGCAGAAGACGGCATACGAGATaactgatcttGTCTCGTGGGCTCGGAGATGT	A1_B3	Nextera_TD	37C	Nextera_Tn5	Native	20k	Rep3	Mouse_lung
N7-74	ATCCGAACGG	CAAGCAGAAGACGGCATACGAGATccgttcggatGTCTCGTGGGCTCGGAGATGT	A2_B3	Omni_TD	37C	Nextera_Tn5	Native	20k	Rep3	Mouse_lung
N7-75	CTGCGCTGGT	CAAGCAGAAGACGGCATACGAGATaccagcgcagGTCTCGTGGGCTCGGAGATGT	A3_B3	THS_TD	37C	Nextera_Tn5	Native	20k	Rep3	Mouse_lung
N7-76	TGCCATGGAA	CAAGCAGAAGACGGCATACGAGATttccatggcaGTCTCGTGGGCTCGGAGATGT	A4_B3	Nextera_TD	37C	Homemade_Tn5	Native	20k	Rep3	Mouse_lung
N7-77	AGCTGAACGC	CAAGCAGAAGACGGCATACGAGATgcgttcagctGTCTCGTGGGCTCGGAGATGT	A5_B3	Omni_TD	37C	Homemade_Tn5	Native	20k	Rep3	Mouse_lung
N7-78	GAGACGTTCT	CAAGCAGAAGACGGCATACGAGATagaacgtctcGTCTCGTGGGCTCGGAGATGT	A6_B3	THS_TD	37C	Homemade_Tn5	Native	20k	Rep3	Mouse_lung
N7-79	CTGACTACTT	CAAGCAGAAGACGGCATACGAGATaagtagtcagGTCTCGTGGGCTCGGAGATGT	C1_B3	Nextera_TD	55C	Nextera_Tn5	Native	20k	Rep3	Mouse_lung
N7-80	CGCCGATATC	CAAGCAGAAGACGGCATACGAGATgatatcggcgGTCTCGTGGGCTCGGAGATGT	C2_B3	Omni_TD	55C	Nextera_Tn5	Native	20k	Rep3	Mouse_lung
N7-81	TGGATCGTTA	CAAGCAGAAGACGGCATACGAGATtaacgatccaGTCTCGTGGGCTCGGAGATGT	C3_B3	THS_TD	55C	Nextera_Tn5	Native	20k	Rep3	Mouse_lung
N7-82	GTACCTGAAT	CAAGCAGAAGACGGCATACGAGATattcaggtacGTCTCGTGGGCTCGGAGATGT	C4_B3	Nextera_TD	55C	Homemade_Tn5	Native	20k	Rep3	Mouse_lung
N7-83	GAATTCTCCA	CAAGCAGAAGACGGCATACGAGATtggagaattcGTCTCGTGGGCTCGGAGATGT	C5_B3	Omni_TD	55C	Homemade_Tn5	Native	20k	Rep3	Mouse_lung
N7-84	AGACCAGGTT	CAAGCAGAAGACGGCATACGAGATaacctggtctGTCTCGTGGGCTCGGAGATGT	C6_B3	THS_TD	55C	Homemade_Tn5	Native	20k	Rep3	Mouse_lung
N7-85	CTAGCTTCTT	CAAGCAGAAGACGGCATACGAGATaagaagctagGTCTCGTGGGCTCGGAGATGT	E1_B3	Nextera_TD	37C	Nextera_Tn5	Native	1k	Rep3	Mouse_lung
N7-86	GGCAACCTTC	CAAGCAGAAGACGGCATACGAGATgaaggttgccGTCTCGTGGGCTCGGAGATGT	E2_B3	Omni_TD	37C	Nextera_Tn5	Native	1k	Rep3	Mouse_lung
N7-87	CCGTTAGCAA	CAAGCAGAAGACGGCATACGAGATttgctaacggGTCTCGTGGGCTCGGAGATGT	E3_B3	THS_TD	37C	Nextera_Tn5	Native	1k	Rep3	Mouse_lung
N7-88	GGCGTCTGCC	CAAGCAGAAGACGGCATACGAGATggcagacgccGTCTCGTGGGCTCGGAGATGT	E4_B3	Nextera_TD	37C	Homemade_Tn5	Native	1k	Rep3	Mouse_lung
N7-89	CGCGCAACCG	CAAGCAGAAGACGGCATACGAGATcggttgcgcgGTCTCGTGGGCTCGGAGATGT	E5_B3	Omni_TD	37C	Homemade_Tn5	Native	1k	Rep3	Mouse_lung
N7-90	AGTCTTAATT	CAAGCAGAAGACGGCATACGAGATaattaagactGTCTCGTGGGCTCGGAGATGT	E6_B3	THS_TD	37C	Homemade_Tn5	Native	1k	Rep3	Mouse_lung
N7-91	TAAGGAACGG	CAAGCAGAAGACGGCATACGAGATccgttccttaGTCTCGTGGGCTCGGAGATGT	G1_B3	Nextera_TD	55C	Nextera_Tn5	Native	1k	Rep3	Mouse_lung
N7-92	TCGTTCATTA	CAAGCAGAAGACGGCATACGAGATtaatgaacgaGTCTCGTGGGCTCGGAGATGT	G2_B3	Omni_TD	55C	Nextera_Tn5	Native	1k	Rep3	Mouse_lung
N7-93	ACTCCAGATT	CAAGCAGAAGACGGCATACGAGATaatctggagtGTCTCGTGGGCTCGGAGATGT	G3_B3	THS_TD	55C	Nextera_Tn5	Native	1k	Rep3	Mouse_lung
N7-94	CGATATATCT	CAAGCAGAAGACGGCATACGAGATagatatatcgGTCTCGTGGGCTCGGAGATGT	G4_B3	Nextera_TD	55C	Homemade_Tn5	Native	1k	Rep3	Mouse_lung
N7-95	GGCTGGCTCT	CAAGCAGAAGACGGCATACGAGATagagccagccGTCTCGTGGGCTCGGAGATGT	G5_B3	Omni_TD	55C	Homemade_Tn5	Native	1k	Rep3	Mouse_lung
N7-96	GGCGGATACC	CAAGCAGAAGACGGCATACGAGATggtatccgccGTCTCGTGGGCTCGGAGATGT	G6_B3	THS_TD	55C	Homemade_Tn5	Native	1k	Rep3	Mouse_lung
